# Supplementary material for: Discovery of a novel ligand that modulates the protein–protein interactions of the AAA+ superfamily oncoprotein reptin
Source: PubMed Central journal article supplement (PMC5490336; doi:10.1039/c4sc03885a), 2015-03-20
Supplement: SC-006-C4SC03885A-s001.pdf [file SC-006-C4SC03885A-s001.pdf]

Supporting Information

## **Discovery of a novel ligand that modulates protein-protein interactions of the AAA+ superfamily protein Reptin**

Alan R Healy, Douglas R Houston\*, Lucy Remnant, Anne-Sophie Huart, Veronika Brychtová, Magda M Maslon, Olivia Meers, Petr Muller, Adam Krecji, Elizabeth A Blackburn, Borek Vojtesek, Lenka Hernychova, Malcolm D Walkinshaw, Nicholas J Westwood\* & Ted R Hupp\*

# 1 Contents

|     |                                                                                              |    |
|-----|----------------------------------------------------------------------------------------------|----|
| 2   | Additional Experimental Information .....                                                    | 4  |
| 2.1 | <i>In Silico</i> Screening and Hit Identification .....                                      | 4  |
| 2.2 | Chemical Synthesis and SAR Study .....                                                       | 8  |
| 2.3 | Analysis of Liddean-induced changes in the conformation and oligomeric state of reptin ..... | 13 |
| 2.4 | H/D Exchange Raw Data .....                                                                  | 14 |
| 2.5 | Discovering new Liddean-Stimulated Peptide Docking Motifs on Reptin .....                    | 24 |
| 2.6 | Proximity Ligation Assay .....                                                               | 27 |
| 2.7 | Purification and thermal shift analysis of the binding of ADP to wt-reptin .....             | 32 |
| 3   | Virtual Screening Materials and Methods .....                                                | 33 |
| 3.1 | Virtual Library Collation .....                                                              | 33 |
| 3.2 | Virtual screening workflow .....                                                             | 33 |
| 3.3 | Redocking Control Experiments.....                                                           | 34 |
| 4   | Synthesis and Characterization of Compounds .....                                            | 36 |
| 4.1 | General Considerations .....                                                                 | 36 |
| 4.2 | General Procedures .....                                                                     | 37 |
| 4.3 | Experimental procedures .....                                                                | 37 |
| 5   | <sup>1</sup> H NMR Spectra of Purchased Compounds (Chembridge) .....                         | 54 |
| 6   | References .....                                                                             | 58 |

## List of Supplementary Figures, Tables and Schemes.

- Page S4 **Figure S1.** Identification of small molecules targeting reptin using an *in silico* screening programme.
- Page S5 **Table S1.** The 30 hits selected for testing in the reptin-AGR2 peptide binding assay.
- Page S6 **Figure S2.** The effect of small molecules on the reptin-AGR2 peptide binding activity.
- Page S7 **Figure S3.** Computational docking of Liddean into the ATP pocket of Pontin/Reptin.
- Page S8 **Scheme S1.** Synthetic modification of Compound **1** to optimize its bioactivity towards reptin.
- Pages S9-10 **Figures S4(a-d).** Structures of analogs of initial hit **1** prepared during the SAR study.
- Page S11 **Scheme S2.** Synthesis of C ring analogs (**S36** and **S37**).
- Pages S12-13 **Figure S5.** Screening of the small molecule series in a reptin-AGR2 peptide interaction ELISA and a discussion of the SAR data that was generated.
- Pages S13-14 **Figure S6.** A more detailed view of changes in the rate of hydrogen/deuterium exchange around the nucleotide pocket.
- Pages S14-15 **Figure S7(a and b).** Sequence coverage after HDX Workbench evaluation and an overview of deuteration of reptin peptides after 30 minutes in the absence of Liddean.
- Pages S16-22 **Table S2.** Output data from hydrogen-deuterium Exchange at the 1 and 5 minute time point.
- Page S23 **Figure S8.** The effects of Liddean on the oligomerization dynamics of reptin.
- Page S24 **Figure S9.** Discovery of new Liddean-dependent interaction motifs for reptin.
- Page S25 **Table S3.** PCR Primer bar codes.
- Page S26 **Figure S10.** Additional ciliopathy proteins present in the list of human proteins which contain consensus sites identified by our Liddean-bound reptin screen.
- Page S27 **Figure S11.** The effects of Liddean on reptin-pontin protein interactions in HCT116 p53<sup>+/+</sup> cells at 2 $\mu$ M.
- Page S28-31 **Figure S12.** The effects of Liddean on reptin-pontin protein interactions in HCT116 p53<sup>-/-</sup> cell models using the proximity ligation assay, immunofluorescence and western blotting.
- Pages S32-33 **Figure S13.** Purification and thermal shift analysis of the binding of ADP to wt-reptin.

## 2 Additional Experimental Information

### 2.1 *In Silico* Screening and Hit Identification

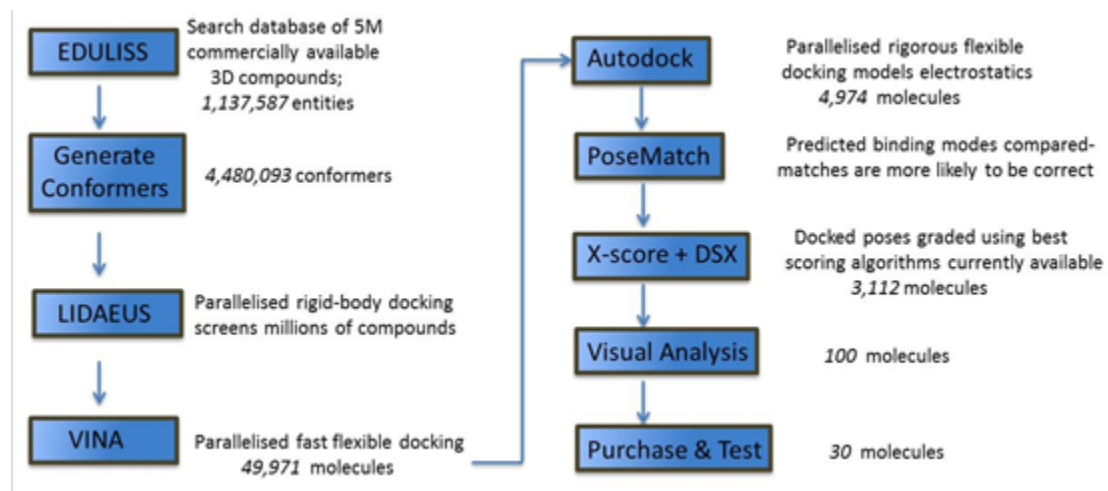

**Fig. S1. Identification of small molecules targeting reptin using an *in silico* screening programme.** (a) Workflow diagram of the *in silico* screening process. Numbers of molecular entities (compounds or conformers) are indicated at each stage. At the start of this research, no X-ray crystal structure of the reptin protein was available, therefore the X-ray crystal structure of pontin (PDB 2C90), a highly conserved paralog of reptin was used. The rigid-body docking program LIDAEUS<sup>1</sup> docked a conformer virtual library of 4.5 million compounds into pontin's Walker A site. The results were ranked based on the LIDAEUS score and the top 49971 compounds were redocked using Vina and Autodock. A "rank-by-rank" consensus protocol prioritized hits, culminating in the visual inspection of the binding mode of the top 100 hits. The hits were divided into 14 classes based on structural similarity and examples of each class were bought for testing (Table S1). This screen was revisited when an X-ray crystal structure of reptin in an alternating heterododecameric complex with pontin was reported (PDB 2XSZ). Comparison with the structure of hexameric pontin (PDB 2C90) verified the high structural similarity between the reptin and pontin ATP-binding pockets (Fig. S3a). However, an important difference was observed in the position of the sensor II residue (Arg400) in reptin compared to pontin (Arg404, Fig. S3a). In the pontin structure, Arg404 was folded over the ATP pocket whereas in reptin Arg400 was located such that the Walker A site was more open (Fig. S3a). On rescreening the library using the Walker A site open structure of reptin, **1** was not identified as a hit. It has been shown using molecular dynamics that Arg400 in reptin and Arg404 in pontin are flexible and control access to the ATP-site<sup>2</sup>. The *in silico* screen was repeated but this time the side chain of Arg400 was locked over the pocket. This screen predicted that **1** bound to reptin's Walker A site, implicating the correct positioning of Arg400 as essential for its binding. When **1** was docked into reptin keeping Arg400 flexible and using energy minimization methods, the side chain of Arg400 folded over the pyridine-oxazolo rings (Fig. S3b). The formation of

hydrogen bonds between Arg400 and both the heterocyclic rings and the amide oxygen in **1** was predicted, suggesting that these may be essential for the activity of **1**.

| Group 1                                                                                                             | Group 2                                                                                                | Group 3                                                                                                        | Group 4                                                                                                                                                       | Group 5                                                                                                   |
|---------------------------------------------------------------------------------------------------------------------|--------------------------------------------------------------------------------------------------------|----------------------------------------------------------------------------------------------------------------|---------------------------------------------------------------------------------------------------------------------------------------------------------------|-----------------------------------------------------------------------------------------------------------|
| 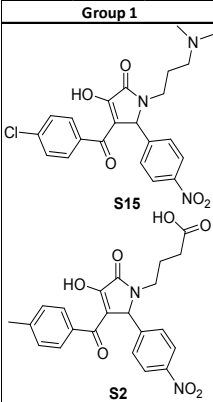 <p>S15</p> <p>S2</p>              |  <p>S19</p> <p>S5</p> |  <p>S17</p> <p>S3</p>         |  <p>S11</p> <p>S16</p>                                                      |  <p>S26</p> <p>S27</p> |
| Group 6                                                                                                             | Group 7                                                                                                | Group 8                                                                                                        | Group 9                                                                                                                                                       | Group 10                                                                                                  |
|  <p>S28</p>                        |  <p>S22</p>           |  <p>S18</p>                   |  <p>S12</p>                                                                 |  <p>S13</p>            |
| Group 11                                                                                                            | Group 12                                                                                               | Group 13                                                                                                       | Group 14 (singular)                                                                                                                                           |                                                                                                           |
|  <p>S21</p> <p>S20</p> <p>S10</p> |  <p>S6</p> <p>S8</p> |  <p>1</p> <p>S9</p> <p>2</p> |  <p>S1</p> <p>S25</p> <p>S14</p> <p>S23</p> <p>S24</p> <p>S4</p> <p>S7</p> |                                                                                                           |

**Table S1. The 30 hits selected for testing in the reptin-AGR2 peptide binding assay.** Visual analysis of the top 100 hits identified the presence of 14 different groups. Groups 1-13 were classified based on a similar structural core. 1-3 analogues were purchased from each group for testing depending on the size and structural diversity of the group. Group 14 contained the remaining analogues that did not contain a common structural core. 7 analogues from this group were purchased for testing.

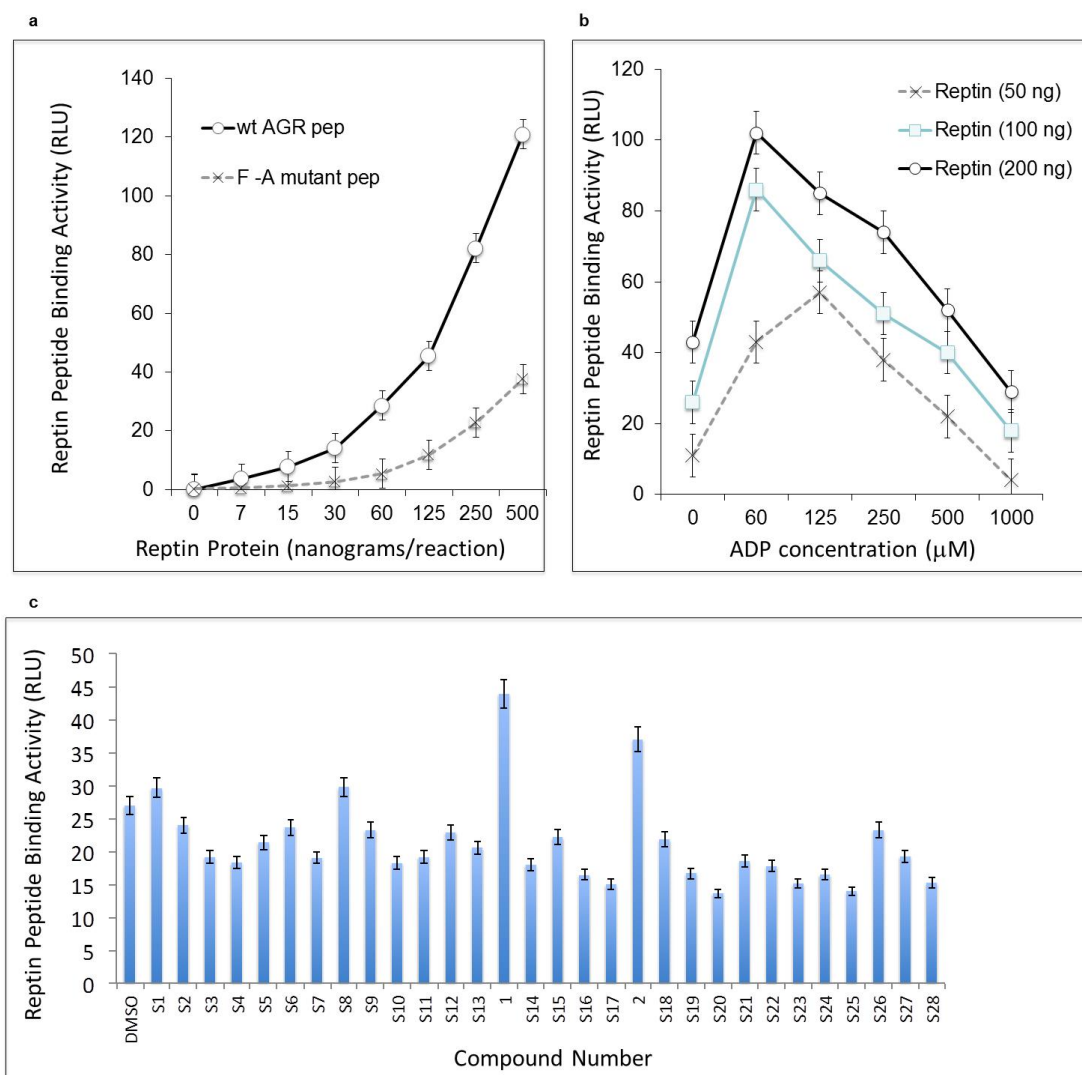

**Fig. S2. The effect of small molecules on the repton-AGR2 peptide binding activity.** (a and b) Development of a protein-protein interaction assay that measures the effects of ligands on the biochemical function of repton. (a) A biotinylated version of the peptide binding motif from wild-type or F104A mutant AGR2 (104-FVLLNLVY-111) was bound onto streptavidin coated wells and repton was titrated followed by a primary antibody to repton and a peroxidase linked secondary antibody to measure binding stability of repton to the AGR2 peptide. The data are plotted as repton binding activity (in RLU) as a function of repton protein levels. (b) Differing concentrations of repton (50, 100, or 200 ng) were incubated with increasing concentrations of ADP. Low concentrations of ADP stimulating the AGR2-peptide binding function of repton, in contrast with higher concentrations which attenuates its binding activity. (c) Repton-AGR2 peptide binding ELISA. The top 30 hits from the *in silico* screen were evaluated in the peptide binding assay at 100 μM. Compounds **1** and **2** (Table S1) significantly stimulated repton's binding activity to the AGR2 peptide relative to the DMSO control.

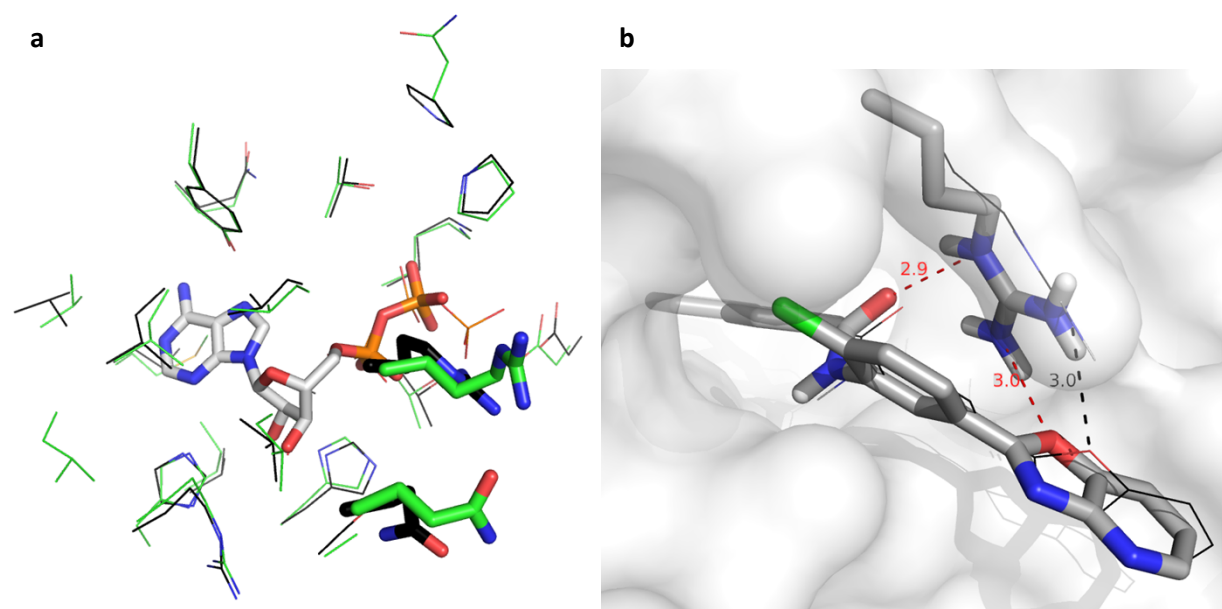

**Fig. S3. Computational docking of Liddean into the ATP pocket of Pontin/Reptin. (a)** Figure showing an overlay of the residues of the reptin (taken from PDB 2XSZ) and pontin (taken from PDB 2C9O) ATP pockets, highlighting the difference in position of two key side chains. Reptin is colored green, pontin black. The ADP molecule from the pontin structure (PDB 2C9O) is shown as sticks, the ATP from the superposed reptin structure (PDB 2XSZ) as lines. **(b)** Original and optimized Autodock predictions of the **1** binding conformation. The predicted mode from the virtual high-throughput screen is shown as black lines and the hydrogen bond it makes with Arg404 are shown as a black dashed line with its length in Å. The result of the docking with maximal parameters and flexible Arg404 activated is shown as grey sticks. Two hydrogen bonds in orange can be seen between the optimized **1** docking pose and the side chain. The calculated angle associated with the NH-(O=C) hydrogen bond is 132.1°.

## 2.2 Chemical Synthesis and SAR Study

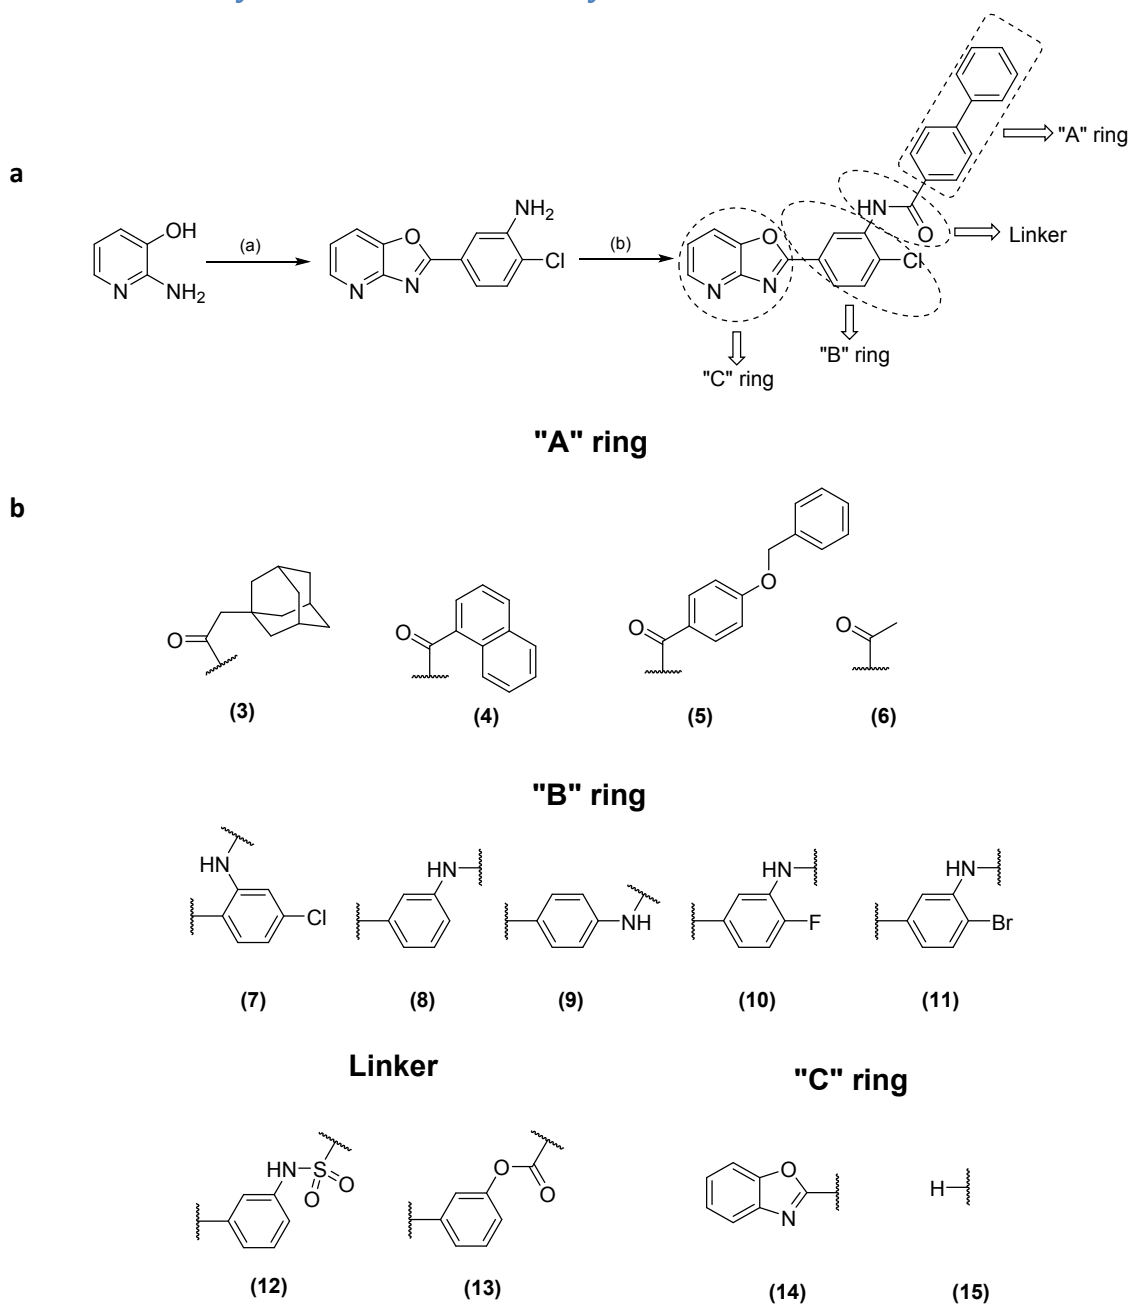

**Scheme S1. Synthetic modification of Compound 1 to optimize its bioactivity towards reptin.** (a) Synthesis of **1**. (i) 3- amino-4-chlorobenzoic acid, PPA, 200 °C, 4 h. (ii) H<sub>2</sub>O, NaHCO<sub>3</sub>, 55%. (b) biphenyl-4-carbonyl chloride, DIPEA, DCM, r.t., 24 h, 57%. (b) A selection of the analogues tested in the SAR study. Compounds (**3** & **4**) were purchased from Chembridge. Compounds (**5** & **15**) was synthesized in an analogous manner to **1**. See **Fig. S5** for the ELISA results of analogs **7,8,10,11,12** and **13** and SAR analysis.



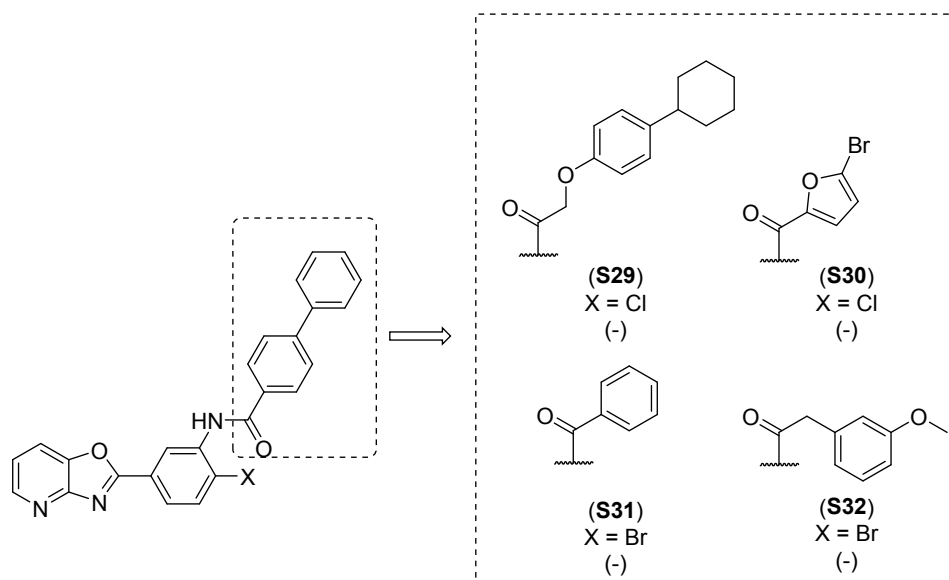

**Fig. S4a.** Additional “A” ring analogs tested in the SAR study. Compounds (**S29** & **S30**) were purchased from Chembridge. Compound (**S31** & **S32**) was synthesized in an analogous manner to **1** (**Scheme S1**). These analogs were inactive in the reptin-AGR2 peptide binding ELISA.

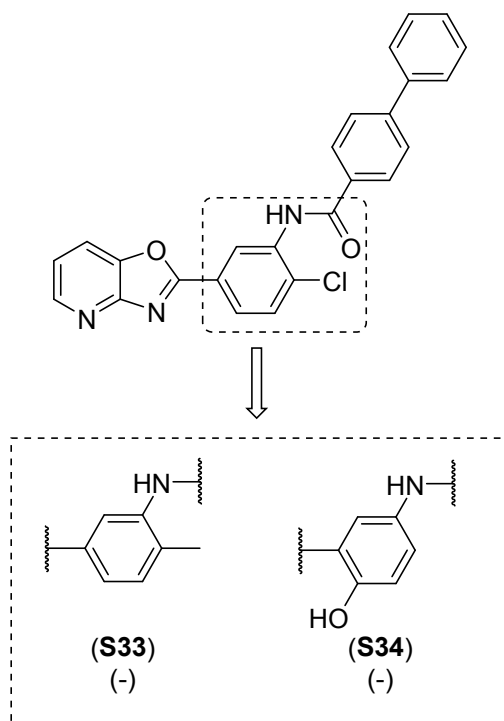

**Fig. S4b.** Additional B ring analogs tested in the SAR study. Compounds **S33** and **S34** were synthesized in an analogous manner to **1** (**Scheme S1**). These analogs were inactive in the reptin-AGR2 peptide binding ELISA.

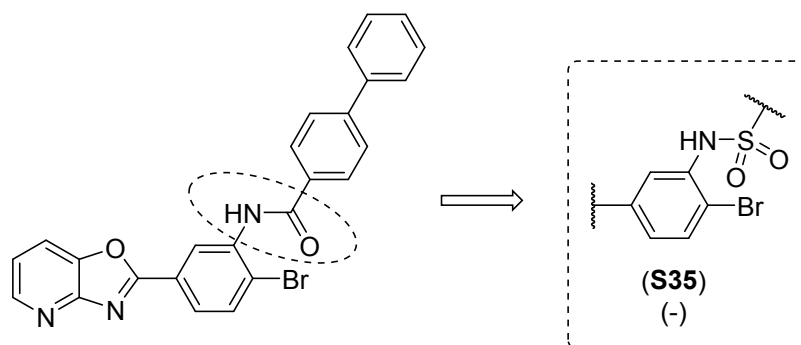

**Fig. S4c. Additional linker unit analogs tested in the SAR study.** Compound **S35** was synthesized in an analogous manner to **1** (Scheme S1). **S35** was inactive in the reptin-AGR2 peptide binding ELISA.

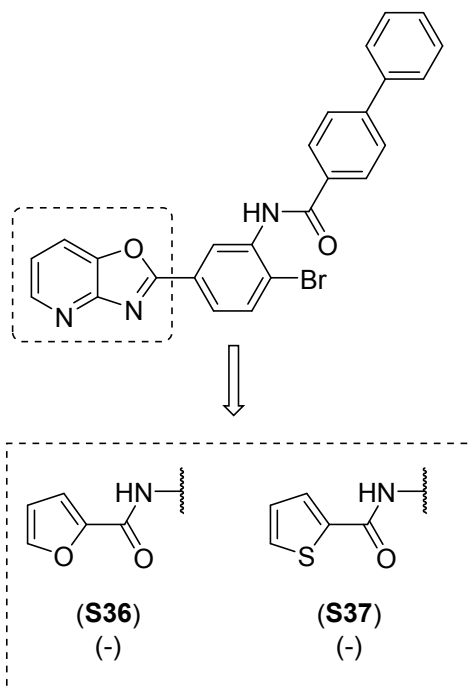

**Fig. S4d. Additional B ring analogs tested in the SAR study.** Compounds **S36** and **S37** were synthesized as shown in Scheme S2. These analogs were inactive in the reptin-AGR2 peptide binding ELISA.

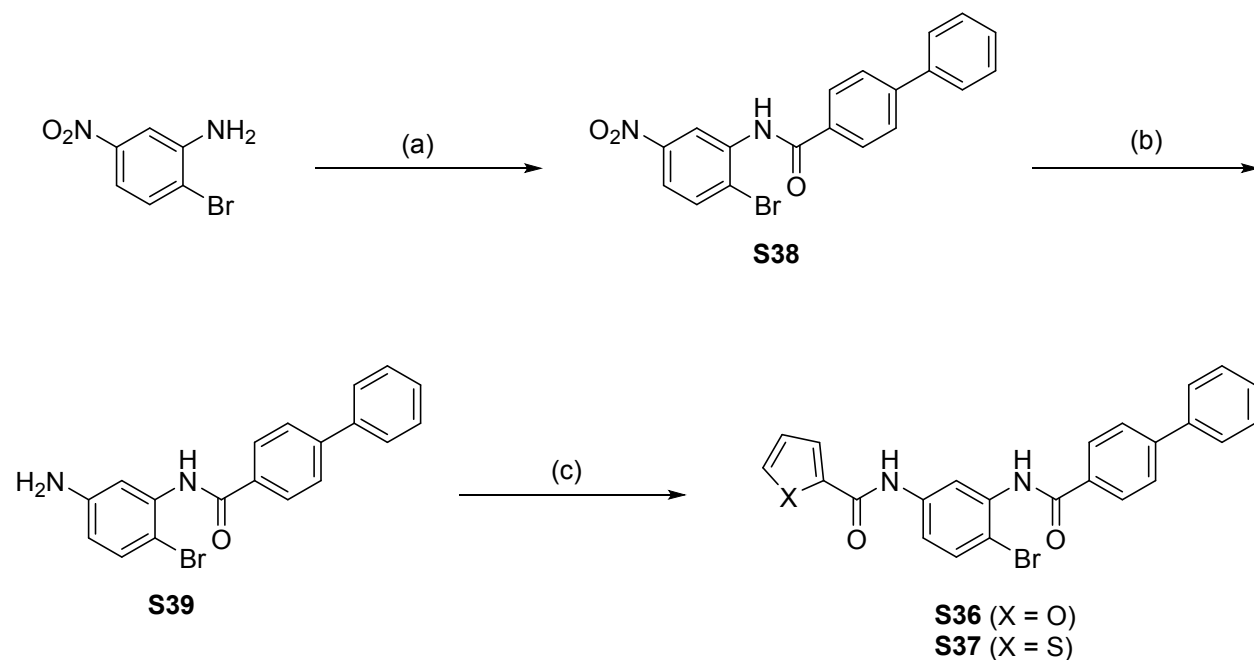

**Scheme S2. Synthesis of C ring analogs (S36 and S37).** (a) Biphenyl-4-carbonyl chloride, pyridine, DCM, r.t., 18 h, 53%. (b) Fe, NH<sub>4</sub>Cl, MeOH, H<sub>2</sub>O, 100 °C, 3 h, 90%. (c) 2-Furoyl chloride (S36) or 2-thiophene chloride (S37), pyridine, DCM, r.t., 18 h, S36 = 72%, S37 = 85%.

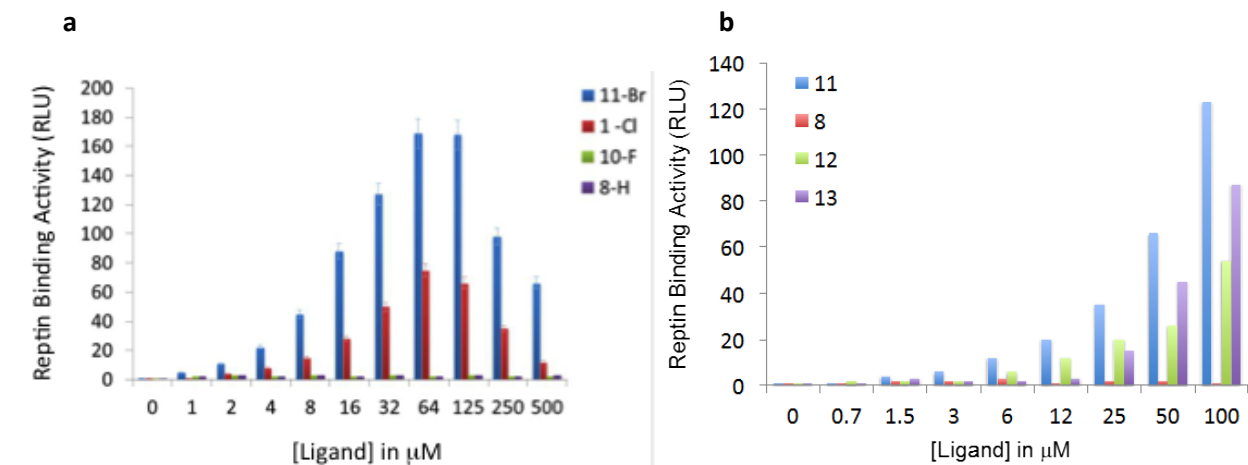

**Fig. S5. Screening of the small molecule series in a reptin-AGR2 peptide interaction ELISA.** A biotinylated version of the peptide binding motif in AGR2 (F104A) was bound onto streptavidin coated wells and reptin (see Figure S13 for production of the recombinant enzyme) was titrated followed by addition of a primary antibody to reptin and a peroxidase linked secondary antibody to measure binding of reptin to the AGR2 peptide. The data are plotted as reptin binding activity (in RLU) as a function of ligand concentration. (a) The effects of a halogen substitution in *ring B* on the binding activity of reptin (see Scheme S1a for a description of the nomenclature used in this figure legend and Scheme 1b for the structures of compounds **8**, **10** and **11**; the structure of compound **1** is shown in Figure 1 of the main manuscript; for the synthesis of compounds **1**, **8**, **10** and **11** see chemistry experimental section below). (b) The effects of *linker* modification on the binding activity of reptin. (see Scheme S1b for the structures of compounds **8**, **11**, **12** and **13**; for the synthesis of compounds **8**, **11**, **12** and **13** see chemistry experimental section below)

#### Brief discussion of the SAR study.

(A) Testing of compounds **3-6** (Scheme 1b) and **S29-S30** (Figure S4a) in this assay showed that they were inactive (**data not shown**) indicating that activity was very sensitive to changes in the A region. This observation led us to retain the A-ring from the initial hit **1**.

(B) B-ring analogs **7-11** (Scheme 1b) and **S33/S34** (Figure S4b) explored two issues: i) the relative positions of the A and C rings and ii) the role of the halogen. Changing the position of the amide group relative to the chlorine from the *meta*- to the *ortho*-position (c.f. **1** vs **7**) was not tolerated (**data not shown**) as expected based on the predicted binding mode. Replacement of the chlorine in **1** with a hydrogen resulted in loss of activity (**1** vs **8**; Fig. S5a) and this could not be rescued by repositioning of the amide group *para*- to the pyridine-oxazolo ring (in **9**; **data not shown**). Variation of the halogen showed that an increase in atomic radius led to increased activity (**10**(F) < **1**(Cl) < **11**(Br)) with bromine analog **11** being the most active (Fig. S5a). A dose titration of the halogen series confirmed a concentration effect on the stimulation and attenuation of the specific reptin-AGR2 peptide binding activity, with as little as 1  $\mu\text{M}$  of **11** showing stimulation (Fig. S5a).

(C) Assessment of analogs **12**, **13** (Scheme S1b) and **S35** (Scheme S4c) that contained modified linkers revealed that the activity increased with linker flexibility. The ester analog **13** was more active than sulfonamide **12**, whilst amide **8** was inactive (Fig. S5b).

(D) Studies on the “C” ring found that changes were not tolerated (analogues **14**, **15** (Scheme S1a) and **S36**, **S37** (Figure S4d); **data not shown**), consistent with a requirement for hydrogen bonding of this heterocycle to Arg400 (Fig S3b). This SAR study identified **11**, now called Liddean, as the most active analogue and provided support for the proposed binding mode.

### 2.3 Analysis of Liddean-induced changes in the conformation and oligomeric state of reptin

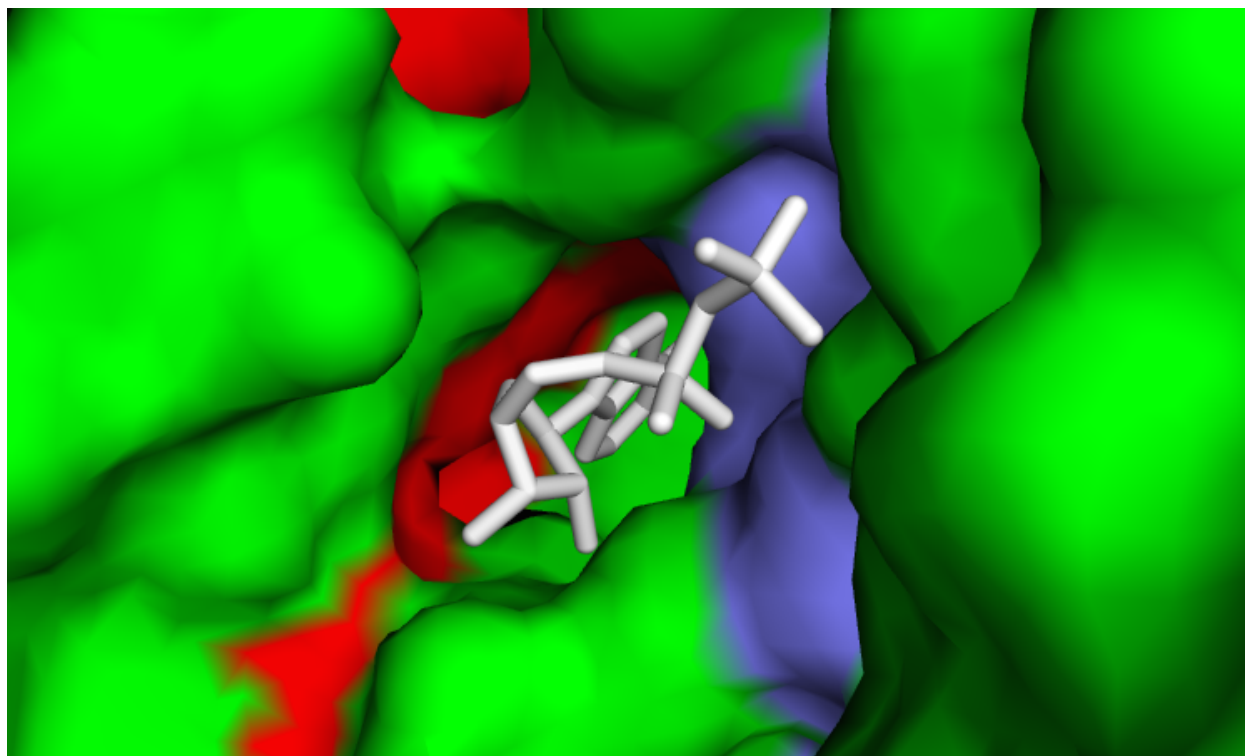

**Fig. S6.** A more detailed view of changes in the rate of hydrogen/deuterium exchange around the nucleotide pocket. Reptin was incubated with excess Liddean (or DMSO control), diluted with D<sub>2</sub>O and incubated over a time course. Acidification followed by pepsin treatment enabled changes in the rate of peptide deuteration to be measured as a function of ligand binding (Table S4). The observed suppression of deuterium exchange by Liddean was most pronounced for amino acids 362-375 adjacent to the Walker A site (PDB 3UK6) and for amino acids 428-439 (at the dimer interface) (Fig. 1d and Fig. S6). Liddean increased the rate of deuterium exchange over many peptic fragments with the most

dominant increase being along the length of the  $\alpha$ -helix (81-95) that contacts to the Walker A site (Fig. 1d and here). These data were consistent with Liddean binding within the Walker A site. The ATP pocket of reptin (PDB 3UK6) is shown as a green surface. Regions with suppressed deuterium exchange are shown in red and regions with increased deuterium exchange are shown in blue. The ADP molecule bound to reptin is shown as white sticks. PDB 3UK6 was used in the HDX as this part of the project was carried out much later when this structure was available whereas PDB 2SXZ was used for the in silico screening.

## 2.4 H/D Exchange Raw Data

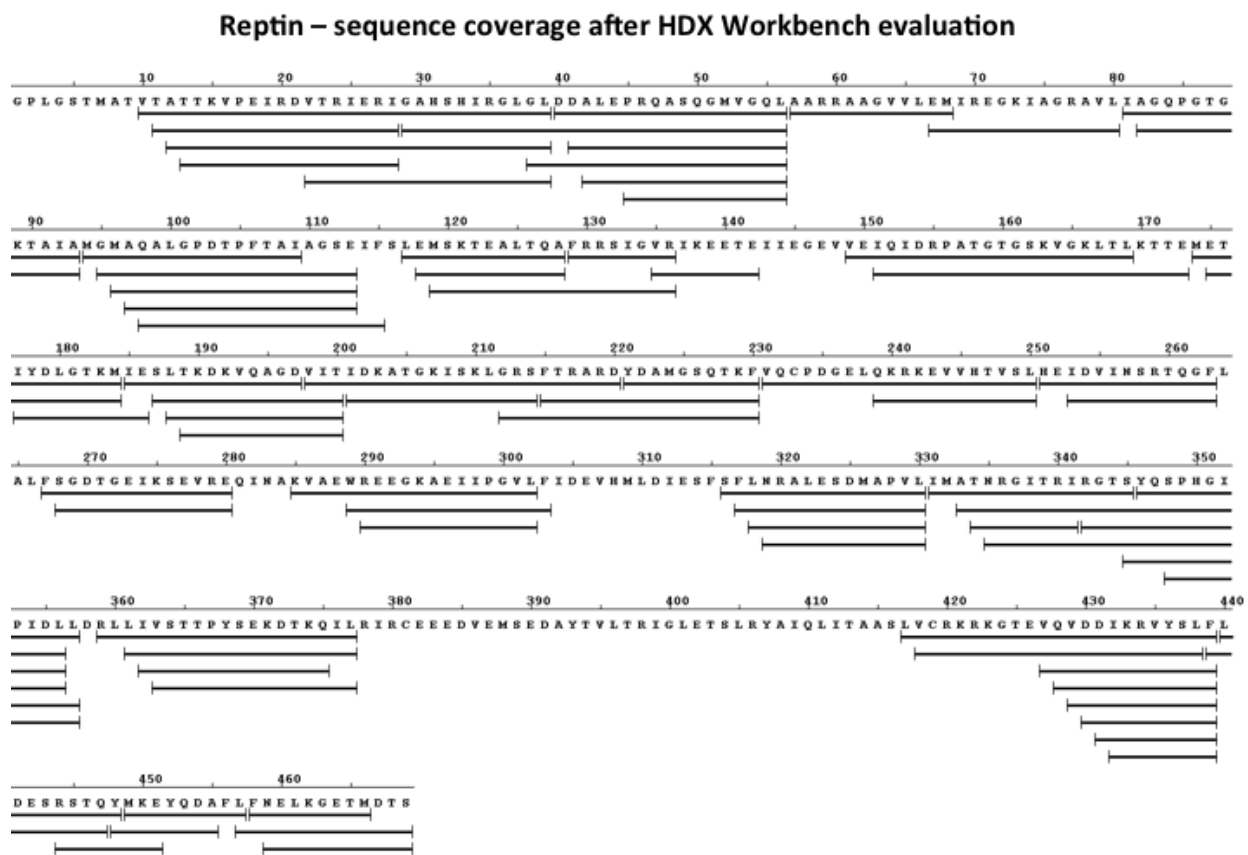

Fig. S7a. Sequence coverage after HDX Workbench evaluation

### Apo-Reptin peptides deuteration –30 min in D<sub>2</sub>O

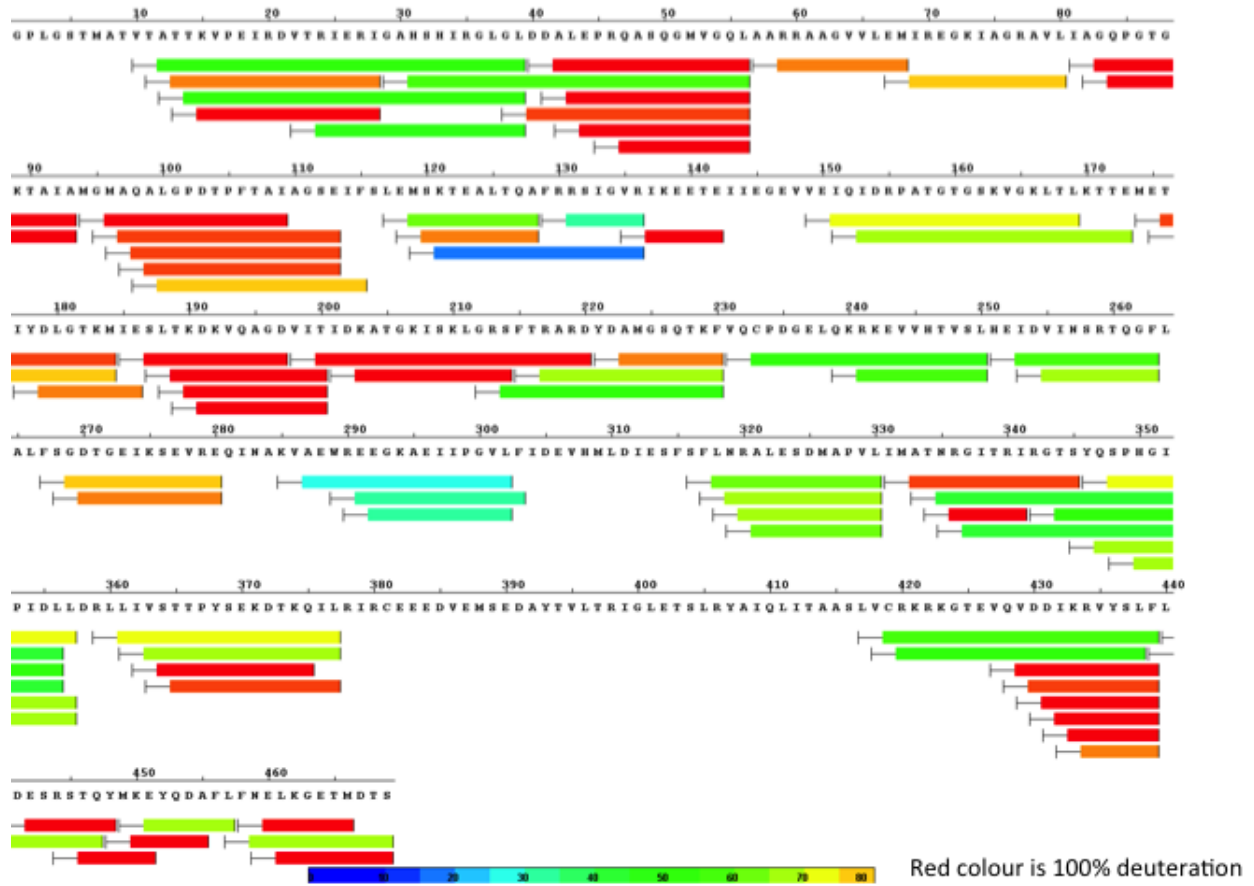

Fig. S7b. Deuteration of reptin peptides after 30 minutes in the absence of Liddean.

**Table S2. Output data from hydrogen-deuterium Exchange at the 1 and 5 minute time point.**

The data is tabulated in columns as: (1) “from to” pinpointing the amino acids with a peptic fragments; (2) time in seconds, with zero the background control reptin along side the % deuteration in the absence or presence of Liddean. The red and the green highlights the most pronounced increases or decreases in deuteration after ligand binding, respectively.

| From | To | Time (sec) | Reptin       | Reptin + Liddean |
|------|----|------------|--------------|------------------|
| 10   | 21 | 0s         | -0.029761905 |                  |
| 10   | 21 | 60s        | 105.3472222  | 102.6845238      |
| 10   | 21 | 300s       | 105.2003968  | 105.4146825      |
| 11   | 28 | 0s         | 0.030357143  |                  |
| 11   | 28 | 60s        | 79.93392857  | 80.60535714      |
| 11   | 28 | 300s       | 80.04821429  | 80.26964286      |
| 12   | 39 | 0s         | 0.054642857  |                  |
| 12   | 39 | 60s        | 48.81107143  | 46.99821429      |
| 12   | 39 | 300s       | 49.2225      | 45.61178571      |
| 22   | 41 | 0s         | -0.011904762 |                  |
| 22   | 41 | 60s        | 32.6984127   | 29.83730159      |
| 22   | 41 | 300s       | 32.78968254  | 31.60714286      |
| 29   | 39 | 0s         | 0.063492063  |                  |
| 29   | 39 | 60s        | 47.67857143  | 48.42063492      |
| 29   | 39 | 300s       | 46.59920635  | 49.11904762      |
| 32   | 39 | 0s         | -0.202380952 |                  |
| 32   | 39 | 60s        | 67.72619048  | 68.50595238      |
| 32   | 39 | 300s       | 67.39285714  | 69.2202381       |
| 38   | 56 | 0s         | -0.034598214 |                  |
| 38   | 56 | 60s        | 65.7734375   | 71.97879464      |
| 38   | 56 | 300s       | 66.18638393  | 69.67075893      |
| 40   | 56 | 0s         | 0.052295918  |                  |
| 40   | 56 | 60s        | 88.24617347  | 86.69005102      |
| 40   | 56 | 300s       | 91.86607143  | 89.58545918      |
| 41   | 57 | 0s         | -0.012755102 |                  |
| 41   | 57 | 60s        | 108.5178571  | 108.2142857      |
| 41   | 57 | 300s       | 108.4515306  | 107.5841837      |
| 42   | 56 | 0s         | 0.001488095  |                  |
| 42   | 56 | 60s        | 95.91815476  | 96.99553571      |
| 42   | 56 | 300s       | 101.3110119  | 99.06994048      |
| 57   | 68 | 0s         | -0.101785714 |                  |
| 57   | 68 | 60s        | 12.27321429  | 21.225           |
| 57   | 68 | 300s       | 13.53214286  | 25.03928571      |
| 67   | 80 | 0s         | -0.035714286 |                  |
| 67   | 80 | 60s        | 46.22321429  | 49.59821429      |



|     |     |      |              |             |
|-----|-----|------|--------------|-------------|
| 67  | 80  | 300s | 53.81547619  | 54.85714286 |
| 69  | 80  | 0s   | -0.008035714 |             |
| 69  | 80  | 60s  | 52.30982143  | 56.45089286 |
| 69  | 80  | 300s | 55.00446429  | 60.12053571 |
| 81  | 94  | 0s   | -0.108766234 |             |
| 81  | 94  | 60s  | 44.41071429  | 65.43344156 |
| 81  | 94  | 300s | 51.24188312  | 68.36850649 |
| 81  | 95  | 0s   | 0.092261905  |             |
| 81  | 95  | 60s  | 41.32738095  | 69.76785714 |
| 81  | 95  | 300s | 46.87202381  | 72.50892857 |
| 85  | 101 | 0s   | -0.085714286 |             |
| 85  | 101 | 60s  | 10.08095238  | 33.65714286 |
| 85  | 101 | 300s | 12.02619048  | 30.14047619 |
| 94  | 113 | 0s   | 0.001116071  |             |
| 94  | 113 | 60s  | 5.280133929  | 12.70424107 |
| 94  | 113 | 300s | 5.202008929  | 10.21986607 |
| 95  | 113 | 0s   | -0.235714286 |             |
| 95  | 113 | 60s  | 7.723809524  | 18.57619048 |
| 95  | 113 | 300s | 6.711904762  | 14.98571429 |
| 96  | 109 | 0s   | -4.728571429 |             |
| 96  | 109 | 60s  | 90.72142857  | 89.99285714 |
| 96  | 109 | 300s | 92.92857143  | 89.25357143 |
| 96  | 113 | 0s   | -0.038265306 |             |
| 96  | 113 | 60s  | 5.892857143  | 12.0127551  |
| 96  | 113 | 300s | 5.505102041  | 9.887755102 |
| 97  | 113 | 0s   | -0.048076923 |             |
| 97  | 113 | 60s  | 7.229395604  | 12.61126374 |
| 97  | 113 | 300s | 6.070054945  | 12.01510989 |
| 98  | 108 | 0s   | 0.020408163  |             |
| 98  | 108 | 60s  | 37.30102041  | 36.96428571 |
| 98  | 108 | 300s | 51.8877551   | 57.74489796 |
| 98  | 115 | 0s   | -0.028061224 |             |
| 98  | 115 | 60s  | 7.081632653  | 9.658163265 |
| 98  | 115 | 300s | 8.033163265  | 9.839285714 |
| 117 | 129 | 0s   | -0.173701299 |             |
| 117 | 129 | 60s  | 16.80681818  | 21.86850649 |
| 117 | 129 | 300s | 19.03409091  | 21.82305195 |
| 120 | 128 | 0s   | -0.089285714 |             |
| 120 | 128 | 60s  | 42.56377551  | 57.69132653 |
| 120 | 128 | 300s | 41.81377551  | 65.94642857 |
| 129 | 136 | 0s   | 0.026785714  |             |
| 129 | 136 | 60s  | 29.70535714  | 32.89583333 |
| 129 | 136 | 300s | 29.77678571  | 36.7172619  |
| 149 | 174 | 0s   | -0.097826087 |             |

|     |     |      |              |             |
|-----|-----|------|--------------|-------------|
| 149 | 174 | 60s  | 11.43944099  | 22.48602484 |
| 149 | 174 | 300s | 10.78416149  | 19.60093168 |
| 151 | 167 | 0s   | -0.1875      |             |
| 151 | 167 | 60s  | 53.59821429  | 50.67091837 |
| 151 | 167 | 300s | 55.56122449  | 54.32142857 |
| 151 | 173 | 0s   | -0.001339286 |             |
| 151 | 173 | 60s  | 29.40401786  | 41.39330357 |
| 151 | 173 | 300s | 33.20223214  | 44.75491071 |
| 174 | 184 | 0s   | -0.047619048 |             |
| 174 | 184 | 60s  | 19.76587302  | 46.82142857 |
| 174 | 184 | 300s | 19.84920635  | 50.82936508 |
| 176 | 184 | 0s   | 0.045918367  |             |
| 176 | 184 | 60s  | 56.10204082  | 55.51530612 |
| 176 | 184 | 300s | 59.97959184  | 62.33163265 |
| 177 | 184 | 0s   | -0.029761905 |             |
| 177 | 184 | 60s  | 51.33333333  | 53.20833333 |
| 177 | 184 | 300s | 57.14285714  | 57.67857143 |
| 185 | 197 | 0s   | -0.079545455 |             |
| 185 | 197 | 60s  | 61.68668831  | 62.65097403 |
| 185 | 197 | 300s | 70.35227273  | 73.60227273 |
| 188 | 200 | 0s   | -0.061688312 |             |
| 188 | 200 | 60s  | 51.30844156  | 46.90584416 |
| 188 | 200 | 300s | 61.94805195  | 62.43831169 |
| 189 | 200 | 0s   | -0.003571429 |             |
| 189 | 200 | 60s  | 49.42857143  | 49.03928571 |
| 189 | 200 | 300s | 68.90714286  | 67.72142857 |
| 198 | 220 | 0s   | 0.015306122  |             |
| 198 | 220 | 60s  | 46.1547619   | 49.71938776 |
| 198 | 220 | 300s | 53.34183673  | 52.67517007 |
| 201 | 214 | 0s   | -0.025297619 |             |
| 201 | 214 | 60s  | 63.90922619  | 67.96875    |
| 201 | 214 | 300s | 66.11160714  | 72.01339286 |
| 201 | 218 | 0s   | -0.006696429 |             |
| 201 | 218 | 60s  | 56.14955357  | 61.65401786 |
| 201 | 218 | 300s | 54.50223214  | 61.515625   |
| 212 | 230 | 0s   | -0.008403361 |             |
| 212 | 230 | 60s  | 35.58403361  | 35.26470588 |
| 212 | 230 | 300s | 36.33193277  | 33.71848739 |
| 215 | 230 | 0s   | 0.058673469  |             |
| 215 | 230 | 60s  | 47.35204082  | 45.3877551  |
| 215 | 230 | 300s | 49.45663265  | 44.67346939 |
| 231 | 250 | 0s   | -0.023109244 |             |
| 231 | 250 | 60s  | 30.29831933  | 34.21218487 |
| 231 | 250 | 300s | 33.28781513  | 37.04411765 |

|     |     |      |              |             |
|-----|-----|------|--------------|-------------|
| 239 | 250 | 0s   | 0.051785714  |             |
| 239 | 250 | 60s  | 37.38035714  | 35.52678571 |
| 239 | 250 | 300s | 41.32321429  | 41.31607143 |
| 251 | 263 | 0s   | -0.008116883 |             |
| 251 | 263 | 60s  | 35.13149351  | 36.10551948 |
| 251 | 263 | 300s | 37.76136364  | 38.35227273 |
| 251 | 266 | 0s   | 0.151147959  |             |
| 251 | 266 | 60s  | 8.59247449   | 13.8692602  |
| 251 | 266 | 300s | 7.59375      | 12.58737245 |
| 253 | 263 | 0s   | -0.025793651 |             |
| 253 | 263 | 60s  | 47.0734127   | 47.56150794 |
| 253 | 263 | 300s | 50.2281746   | 49.24801587 |
| 267 | 277 | 0s   | 0.001984127  |             |
| 267 | 277 | 60s  | 73.83531746  | 66.03769841 |
| 267 | 277 | 300s | 73.6765873   | 68.88293651 |
| 267 | 284 | 0s   | 0.044642857  |             |
| 267 | 284 | 60s  | 41.10044643  | 40.28348214 |
| 267 | 284 | 300s | 52.38616071  | 48.55803571 |
| 279 | 288 | 0s   | 0            |             |
| 279 | 288 | 60s  | 52.02232143  | 39.41517857 |
| 279 | 288 | 300s | 61.875       | 59.28571429 |
| 285 | 302 | 0s   | -0.042857143 |             |
| 285 | 302 | 60s  | 4.382142857  | 10.35357143 |
| 285 | 302 | 300s | 4.507142857  | 11.45       |
| 289 | 302 | 0s   | -0.012175325 |             |
| 289 | 302 | 60s  | 4.492694805  | 11.78814935 |
| 289 | 302 | 300s | 5.320616883  | 13.38068182 |
| 290 | 302 | 0s   | -0.064285714 |             |
| 290 | 302 | 60s  | 10.57142857  | 13.71428571 |
| 290 | 302 | 300s | 13.33214286  | 15.78214286 |
| 292 | 302 | 0s   | -0.073660714 |             |
| 292 | 302 | 60s  | 7.854910714  | 14.40401786 |
| 292 | 302 | 300s | 11.41294643  | 16.71651786 |
| 303 | 309 | 0s   | -0.914285714 |             |
| 303 | 309 | 60s  | 4.892857143  | 7.7         |
| 303 | 309 | 300s | 5.328571429  | 8.178571429 |
| 304 | 311 | 0s   | 0.101190476  |             |
| 304 | 311 | 60s  | 13.7202381   | 13.625      |
| 304 | 311 | 300s | 17.39285714  | 16.9702381  |
| 316 | 330 | 0s   | 0.058035714  |             |
| 316 | 330 | 60s  | 6.180059524  | 12.98363095 |
| 316 | 330 | 300s | 6.441964286  | 13.69494048 |
| 317 | 330 | 0s   | -0.006493506 |             |
| 317 | 330 | 60s  | 16.45779221  | 26.17857143 |

|            |            |             |                     |                    |
|------------|------------|-------------|---------------------|--------------------|
| 317        | 330        | 300s        | 16.47402597         | 27.09415584        |
| 319        | 327        | 0s          | 0.168367347         |                    |
| 319        | 327        | 60s         | 64.80102041         | 54.48469388        |
| 319        | 327        | 300s        | 70.8877551          | 67.20408163        |
| 331        | 345        | 0s          | 0.057692308         |                    |
| 331        | 345        | 60s         | 74.32417582         | 73.0260989         |
| 331        | 345        | 300s        | 78.93131868         | 77.43131868        |
| 331        | 357        | 0s          | -0.053571429        |                    |
| 331        | 357        | 60s         | 8.718167702         | 23.25232919        |
| 331        | 357        | 300s        | 9.666149068         | 23.83462733        |
| <b>333</b> | <b>345</b> | <b>0s</b>   | <b>-0.073051948</b> |                    |
| <b>333</b> | <b>345</b> | <b>60s</b>  | <b>6.76461039</b>   | <b>77.625</b>      |
| <b>333</b> | <b>345</b> | <b>300s</b> | <b>16.08116883</b>  | <b>83.18668831</b> |
| 333        | 356        | 0s          | -0.005357143        |                    |
| 333        | 356        | 60s         | 21.17678571         | 27.95357143        |
| 333        | 356        | 300s        | 27.64017857         | 29.09196429        |
| 335        | 356        | 0s          | -0.063492063        |                    |
| 335        | 356        | 60s         | 29.66269841         | 30.55555556        |
| 335        | 356        | 300s        | 32.12301587         | 32.87698413        |
| 342        | 356        | 0s          | -0.185064935        |                    |
| 342        | 356        | 60s         | 50.11688312         | 51.01298701        |
| 342        | 356        | 300s        | 50.94480519         | 50.50649351        |
| 344        | 357        | 0s          | -0.108928571        |                    |
| 344        | 357        | 60s         | 28.4625             | 42.07321429        |
| 344        | 357        | 300s        | 34.6875             | 45.15178571        |
| 345        | 356        | 0s          | -0.058035714        |                    |
| 345        | 356        | 60s         | 62.27678571         | 61.90178571        |
| 345        | 356        | 300s        | 60.12946429         | 60.94196429        |
| 346        | 357        | 0s          | -0.073660714        |                    |
| 346        | 357        | 60s         | 35.35491071         | 43.41294643        |
| 346        | 357        | 300s        | 41.91294643         | 48.05133929        |
| 348        | 357        | 0s          | 0.028061224         |                    |
| 348        | 357        | 60s         | 66.50255102         | 65.83418367        |
| 348        | 357        | 300s        | 65.38520408         | 65.67602041        |
| 359        | 377        | 0s          | -0.127232143        |                    |
| 359        | 377        | 60s         | 32.81919643         | 48.96428571        |
| 359        | 377        | 300s        | 35.91964286         | 44.12276786        |
| 361        | 375        | 0s          | 0.005952381         |                    |
| 361        | 375        | 60s         | 44.47916667         | 47.9375            |
| 361        | 375        | 300s        | 49.93154762         | 52.78571429        |
| <b>362</b> | <b>375</b> | <b>0s</b>   | <b>0.002435065</b>  |                    |
| <b>362</b> | <b>375</b> | <b>60s</b>  | <b>80.56899351</b>  | <b>44.98295455</b> |
| <b>362</b> | <b>375</b> | <b>300s</b> | <b>73.79464286</b>  | <b>56.04788961</b> |
| 362        | 377        | 0s          | 0.059065934         |                    |

|            |            |             |                    |                    |
|------------|------------|-------------|--------------------|--------------------|
| 362        | 377        | 60s         | 18.84752747        | 16.90521978        |
| 362        | 377        | 300s        | 20.26236264        | 21.9739011         |
| 363        | 377        | 0s          | 0.022321429        |                    |
| 363        | 377        | 60s         | 45.13839286        | 46.75446429        |
| 363        | 377        | 300s        | 50.49107143        | 52.63392857        |
| 397        | 405        | 0s          | 0.051020408        |                    |
| 397        | 405        | 60s         | 41.87755102        | 47.60204082        |
| 397        | 405        | 300s        | 52.20408163        | 54.83163265        |
| 404        | 410        | 0s          | 0                  |                    |
| 404        | 410        | 60s         | 89.28571429        | 83.01428571        |
| 404        | 410        | 300s        | 98.72142857        | 95.30714286        |
| 418        | 438        | 0s          | -0.028195489       |                    |
| 418        | 438        | 60s         | 30.59210526        | 33.56109023        |
| 418        | 438        | 300s        | 41.10902256        | 39.73308271        |
| 418        | 439        | 0s          | -0.010714286       |                    |
| 418        | 439        | 60s         | 10.84642857        | 13.78571429        |
| 418        | 439        | 300s        | 10.73571429        | 16.97142857        |
| 427        | 438        | 0s          | 0.05               |                    |
| 427        | 438        | 60s         | 33.82142857        | 24.52142857        |
| 427        | 438        | 300s        | 32.09285714        | 31.425             |
| 427        | 439        | 0s          | -0.00974026        |                    |
| 427        | 439        | 60s         | 14.81168831        | 18.99025974        |
| 427        | 439        | 300s        | 12.72402597        | 24.80844156        |
| <b>428</b> | <b>439</b> | <b>0s</b>   | <b>0.073214286</b> |                    |
| <b>428</b> | <b>439</b> | <b>60s</b>  | <b>115.5303571</b> | <b>69.20535714</b> |
| <b>428</b> | <b>439</b> | <b>300s</b> | <b>102.1267857</b> | <b>81.7875</b>     |
| 429        | 439        | 0s          | -0.128968254       |                    |
| 429        | 439        | 60s         | 20.91865079        | 20.72420635        |
| 429        | 439        | 300s        | 18.74007937        | 28.54960317        |
| 430        | 438        | 0s          | 0.056122449        |                    |
| 430        | 438        | 60s         | 35.09693878        | 32.38265306        |
| 430        | 438        | 300s        | 39.61734694        | 38.1377551         |
| 431        | 439        | 0s          | -0.045918367       |                    |
| 431        | 439        | 60s         | 22.19387755        | 29.23469388        |
| 431        | 439        | 300s        | 19.41326531        | 35.06632653        |
| 432        | 439        | 0s          | -0.047619048       |                    |
| 432        | 439        | 60s         | 23.48214286        | 30.98214286        |
| 432        | 439        | 300s        | 25.33333333        | 39.47619048        |
| 439        | 448        | 0s          | 0.060267857        |                    |
| 439        | 448        | 60s         | 33.61383929        | 42.06026786        |
| 439        | 448        | 300s        | 35.87276786        | 41.01116071        |
| 444        | 451        | 0s          | 0.232142857        |                    |
| 444        | 451        | 60s         | 186.0952381        | 114.8690476        |
| 444        | 451        | 300s        | 186.3214286        | 115.8571429        |

|     |     |      |              |             |
|-----|-----|------|--------------|-------------|
| 448 | 455 | 0s   | 0.151785714  |             |
| 448 | 455 | 60s  | 58.66369048  | 75.52678571 |
| 448 | 455 | 300s | 60.0327381   | 70.0625     |
| 457 | 469 | 0s   | -0.076298701 |             |
| 457 | 469 | 60s  | 42.29383117  | 49.69318182 |
| 457 | 469 | 300s | 42.15097403  | 44.49188312 |
| 458 | 466 | 0s   | -0.040816327 |             |
| 458 | 466 | 60s  | 76.9744898   | 78.3622449  |
| 458 | 466 | 300s | 78.70408163  | 77.95408163 |
| 458 | 467 | 0s   | 0.129464286  |             |
| 458 | 467 | 60s  | 51.42857143  | 57.51785714 |
| 458 | 467 | 300s | 52.71875     | 56.58035714 |

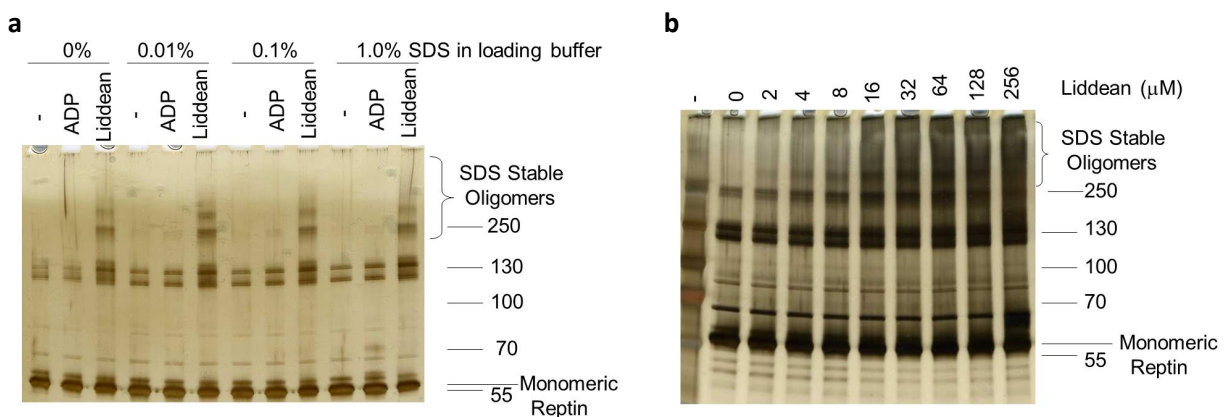

**Fig. S8. The effects of Liddean on the oligomerization dynamics of reptin.** (a). Reptin (1  $\mu\text{g}$ ) was subjected to denaturing SDS (0.1%) gel electrophoresis in ADP binding buffer without or with ADP (100  $\mu\text{M}$ ) or Liddean (100  $\mu\text{M}$ ), as indicated. After 30 minutes of incubation at room temperature, gel loading buffer was added (with the indicated SDS concentrations from 0 to 1%), and electrophoresis was then carried out. Reptin protein was visualized by silver staining. (b). Reptin (1  $\mu\text{g}$ ) was subjected to denaturing SDS (0.1%) gel electrophoresis in ADP binding buffer with increasing concentrations of Liddean, as indicated. After 30 minutes of incubation at room temperature, gel loading buffer (0% SDS) was added and electrophoresis was carried out. Reptin protein was visualized by silver staining. This formation of SDS-resistant oligomers correlates with the specific reptin-AGR2 peptide binding activity induced by Liddean (Fig. S5a, compound 11).

## 2.5 Discovering new Liddean-Stimulated Peptide Docking Motifs on Reptin

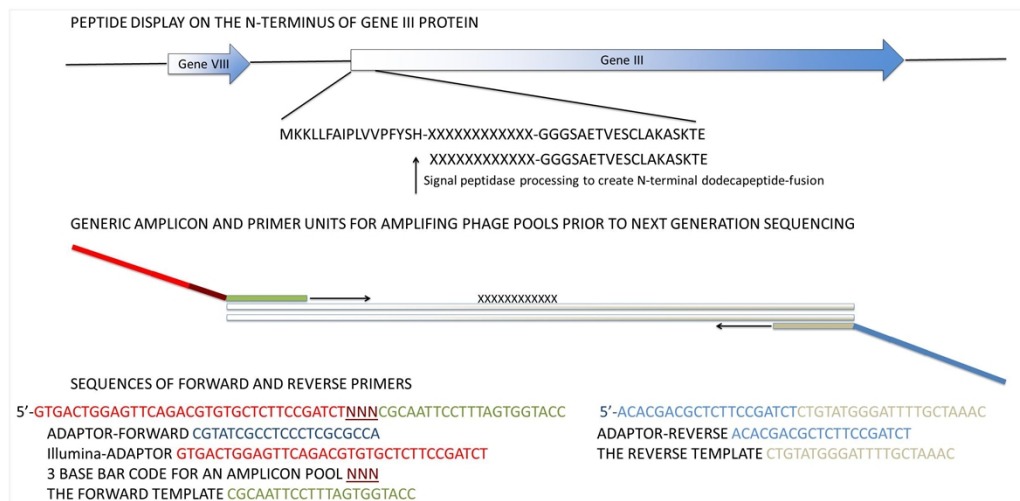

**Fig. S9. Discovery of new Liddean-dependent interaction motifs for reptin.** Next generation sequencing of peptide-phage pool obtained from a reptin screen in the *apo* and ligand bound state. Reptin without or with ligand was adsorbed onto the solid phase without or with ligands ADP or Liddean. After selection of the peptide library on reptin protein, elution and propagation in bacteria, the phage DNA was amplified using PCR primer sets that capture the sequences flanking the peptide insert (as shown above). Pooling of all phage into deep sequencing reactions can be done with subsequent deconvolution using the “bar code” whose position in the primer is indicated.

Please note: **The raw phage display data is available from the authors on request.**



| Primer     | Sequence 5'-3'                                              |
|------------|-------------------------------------------------------------|
| Forward 00 | GTGACTGGAGTTCAGACGTGTGCTCTTCCGATCTAAACGCAATTCCTTTAGTGGTACC  |
| Forward 01 | GTGACTGGAGTTCAGACGTGTGCTCTTCCGATCTAATCGCAATTCCTTTAGTGGTACC  |
| Forward 02 | GTGACTGGAGTTCAGACGTGTGCTCTTCCGATCTAAGCGCAATTCCTTTAGTGGTACC  |
| Forward 03 | GTGACTGGAGTTCAGACGTGTGCTCTTCCGATCTAACCGCAATTCCTTTAGTGGTACC  |
| Forward 04 | GTGACTGGAGTTCAGACGTGTGCTCTTCCGATCTATACGCAATTCCTTTAGTGGTACC  |
| Forward 05 | GTGACTGGAGTTCAGACGTGTGCTCTTCCGATCTATTGCGCAATTCCTTTAGTGGTACC |
| Forward 06 | GTGACTGGAGTTCAGACGTGTGCTCTTCCGATCTATGCGCAATTCCTTTAGTGGTACC  |
| Forward 07 | GTGACTGGAGTTCAGACGTGTGCTCTTCCGATCTATCCGCAATTCCTTTAGTGGTACC  |
| Forward 08 | GTGACTGGAGTTCAGACGTGTGCTCTTCCGATCTAGACGCAATTCCTTTAGTGGTACC  |
| Forward 09 | GTGACTGGAGTTCAGACGTGTGCTCTTCCGATCTAGTCGCAATTCCTTTAGTGGTACC  |
| Forward 10 | GTGACTGGAGTTCAGACGTGTGCTCTTCCGATCTAGGCGCAATTCCTTTAGTGGTACC  |
| Forward 11 | GTGACTGGAGTTCAGACGTGTGCTCTTCCGATCTAGCCGCAATTCCTTTAGTGGTACC  |
| Forward 12 | GTGACTGGAGTTCAGACGTGTGCTCTTCCGATCTACACGCAATTCCTTTAGTGGTACC  |
| Forward 13 | GTGACTGGAGTTCAGACGTGTGCTCTTCCGATCTACTCGCAATTCCTTTAGTGGTACC  |
| Forward 14 | GTGACTGGAGTTCAGACGTGTGCTCTTCCGATCTACGCGCAATTCCTTTAGTGGTACC  |
| Forward 15 | GTGACTGGAGTTCAGACGTGTGCTCTTCCGATCTACCCGCAATTCCTTTAGTGGTACC  |
| Forward 16 | GTGACTGGAGTTCAGACGTGTGCTCTTCCGATCTAAACGCAATTCCTTTAGTGGTACC  |
| Reverse    | ACACGACGCTCTTCCGATCTCTGTATGGGATTTGCTAAAC                    |

**Table S3. PCR Primer bar codes.** PCR was used to amplify phage DNA from each round of screening using the primer bar codes shown here that have an Illumina adaptor sequence and a 3 letter bar code

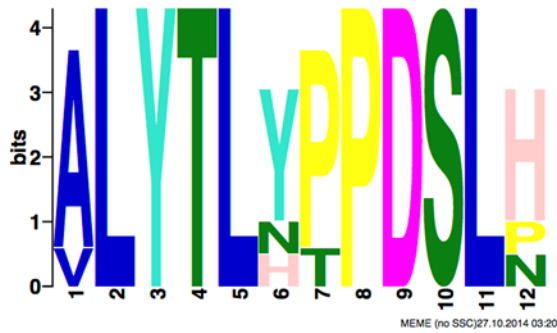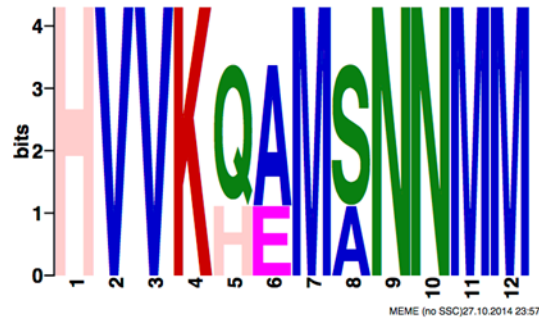

Ref XP 005256701.1 **lethal (2) giant Larvae protein homolog 1**; *Lethal giant larvae 2 regulates development of the ciliated organ Kupffer's vesicle*. Development 2013; 140 1550.

Ref XP 859065.2 **LEBERCILIN** *Mutations in LCA5 encoding the Ciliary protein lebercilin Cause Leber congenital amaurosis*. Nat Genetics 2007; 39 889.

Query 4 TLHPPDSL  
 TLHP DSL  
 Sbjct 637 TLHPNDSL

Query 1 HVVKQE 6  
 HVVKQE  
 Sbjct 399 HVVKQE 404

**Fig. S10.** Additional ciliopathy proteins present in the list of human proteins which contain consensus sites identified by our Liddean-bound reptin screen. Processing the top 500 peptides from the *apo* and Liddean bound reptin using MEME to identify the top 10 consensus motifs (<http://meme.nbcr.net/meme/cgi-bin/meme.cgi>) highlights the distinct sets of motifs acquired in the *apo* and ligand bound form. The motifs were processed using MAST or *blastp* to identify targets in the human proteome that have matches to these motifs, some of which are listed as potential ciliopathy targets (**above**).

## 2.6 Proximity Ligation Assay

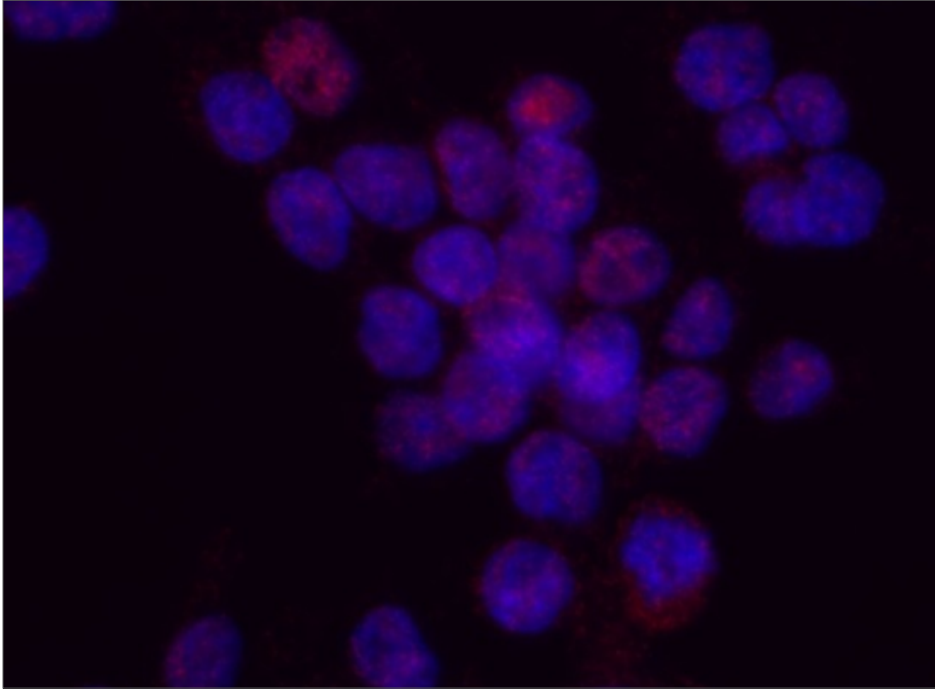

**Fig. S11. The effects of Liddean on reptin-pontin protein interactions in HCT116 p53+/+ cells at 2 $\mu$ M.** HCT116 cells were processed using the proximity ligation method to identify whether reptin forms a protein-protein interaction in cells and the images are superimposed using DAPI to highlight the nuclear (blue) or cytosolic foci location. The data highlight the foci of reptin-pontin complexes with 2  $\mu$ M Liddean. The incubation of cells with 2  $\mu$ M Liddean induced more apparent aggregates and less individual foci, possibly as increased concentrations of Liddean induce the formation of higher-order reptin and pontin complexes in cells.

a

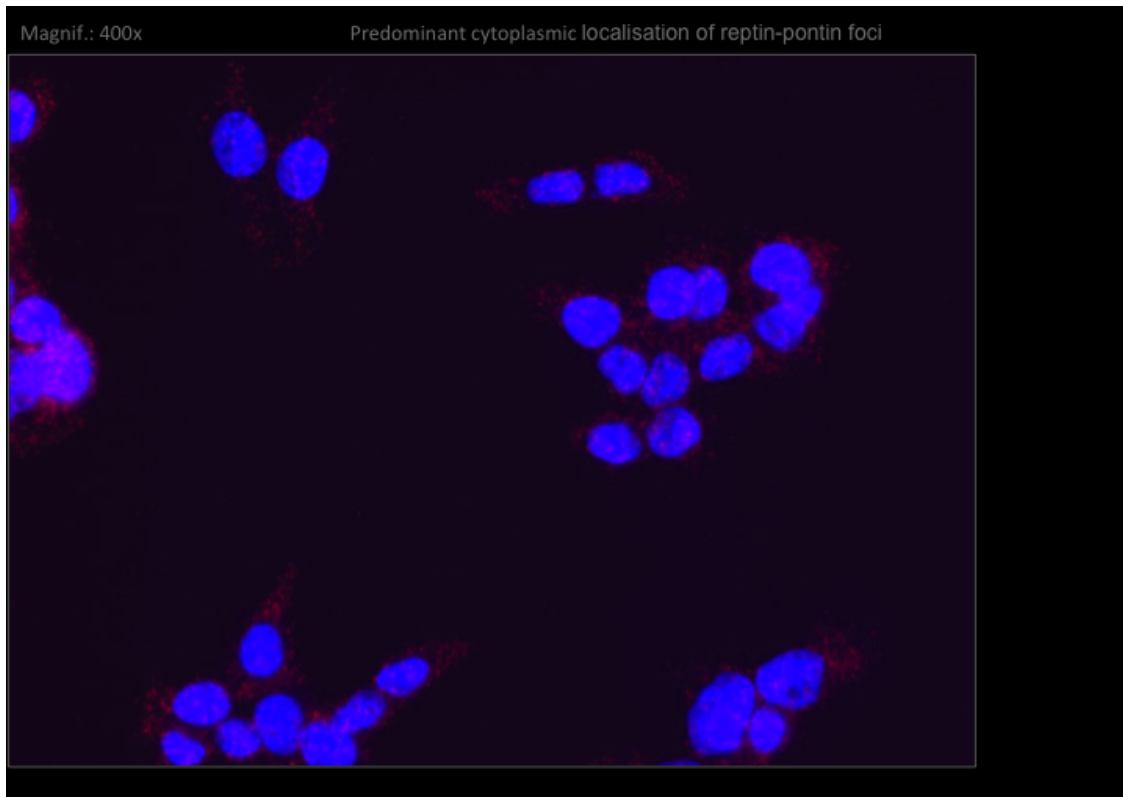

b

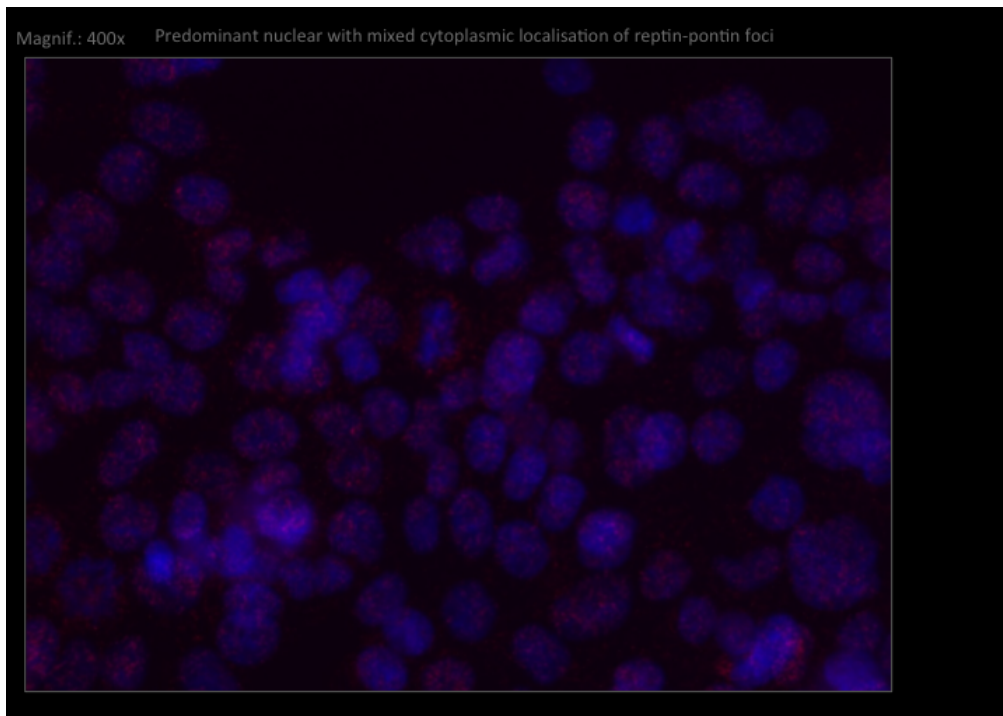

c

Magnif.: 400x Predominant Nuclear localisation of reptin-pontin foci

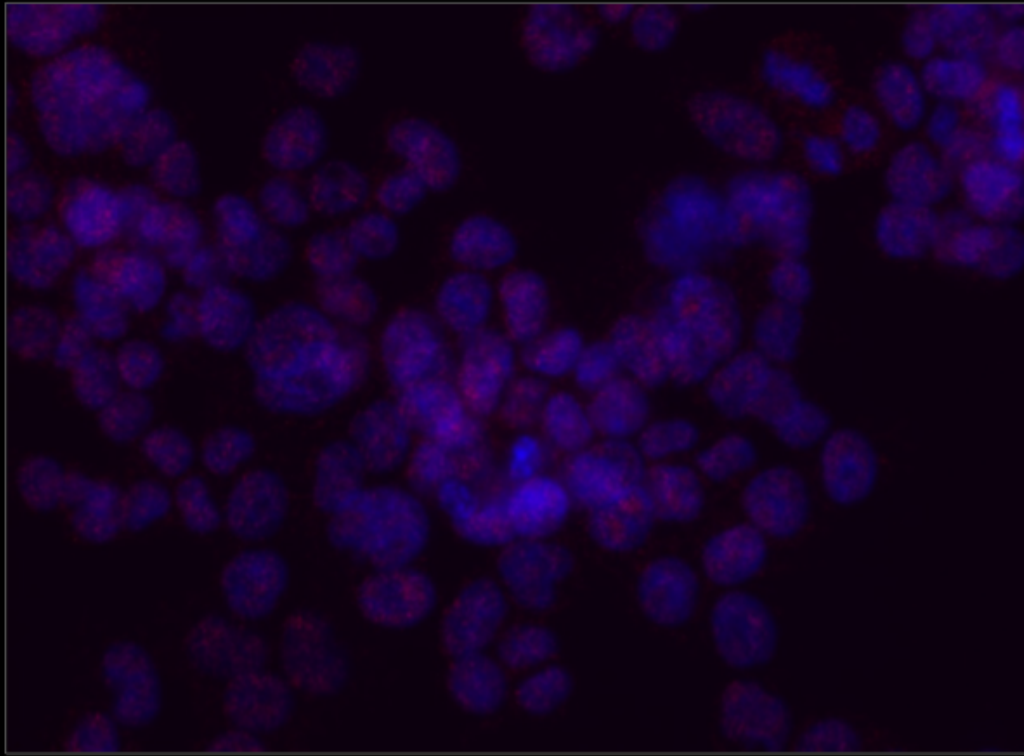

d. Reptin IF without Liddean

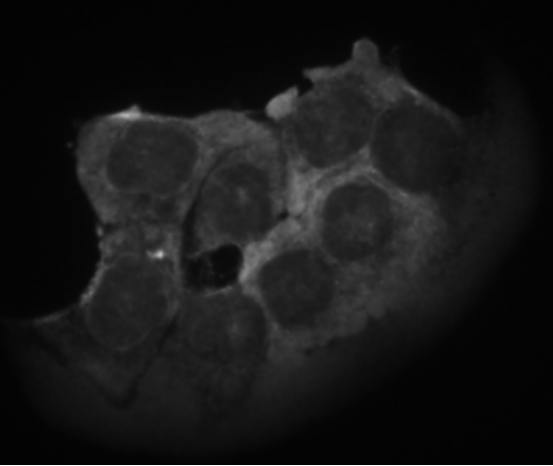

e. Pontin IF without Liddean

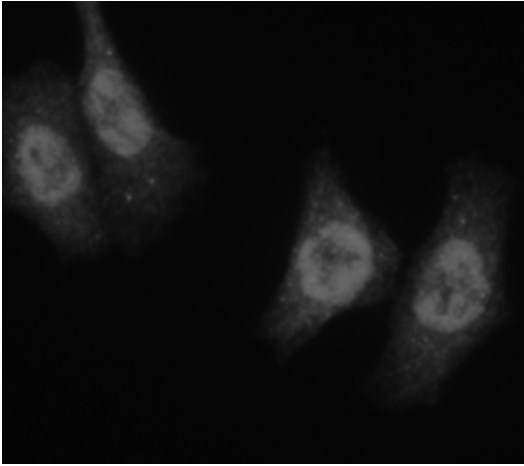

f. Reptin IF with Liddean

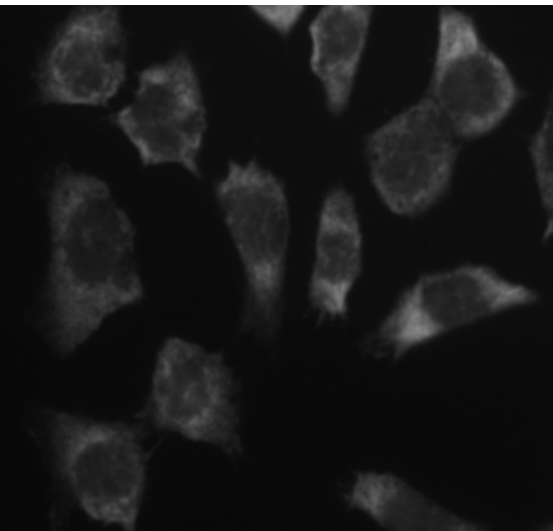

g. Pontin IF with Liddean

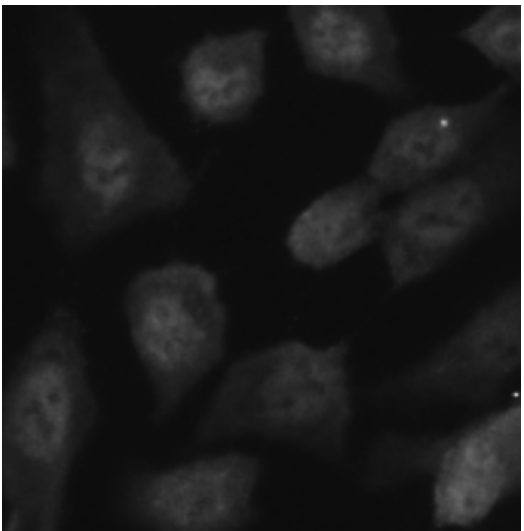

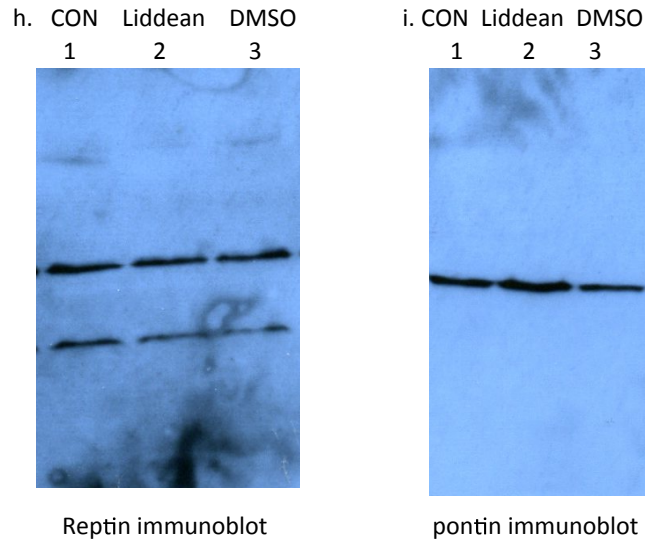

**Figure S12. The effects of Liddean on reptin-pontin protein interactions in HCT116 p53<sup>-/-</sup> cell models using the proximity ligation assay, immunofluorescence and western blotting.** HCT116 cells (functionally p53-null) were processed using the proximity ligation method to identify whether reptin forms a protein-protein interaction in cells and the images are superimposed using DAPI to highlight the nuclear (blue) or cytosolic foci location. The data highlight the foci of: **(a)** reptin-pontin complexes in DMSO treated cells; **(b)** reptin-pontin complexes in cells treated with 1  $\mu$ M Liddean; and **(c)** reptin-pontin complexes with 2  $\mu$ M Liddean; (d)-(g) Immunofluorescence studies to assess the localization of pontin and reptin in HCT116 cells in the presence or absence of Liddean. In the absence of Liddean, (d) reptin is largely cytosolic and (e) pontin is mixed cytosolic/nuclear; in the presence of Liddean, (f) the majority of reptin is cytosolic and (g) pontin is mixed cytosolic/nuclear. These results are consistent with a situation in which the majority of reptin and pontin are not changing localization on addition of Liddean; (h)-(i) western blot without fractionation from urea based lysis buffers.

## 2.7 Purification and thermal shift analysis of the binding of ADP to wt-reptin.

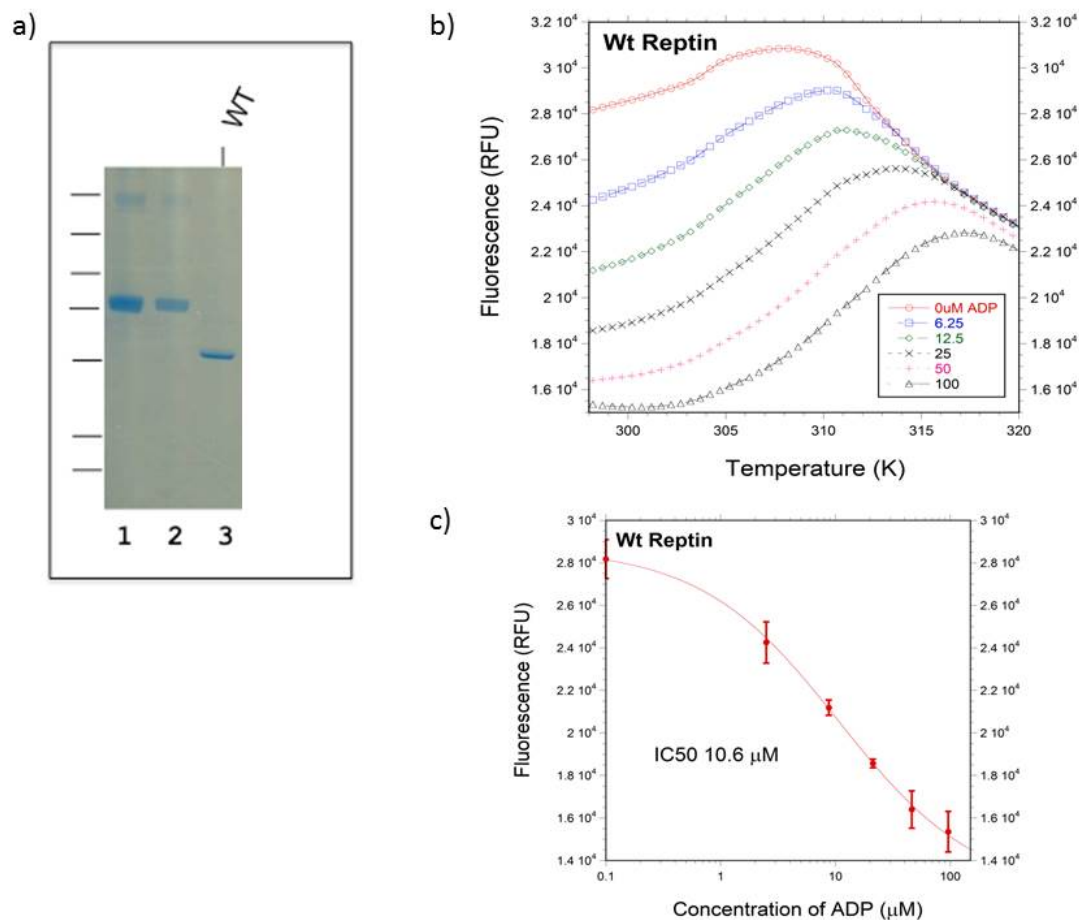

**Fig. S13. Purification and thermal shift analysis of the binding of ADP to wt-reptin.** (a) Purification of biochemically active Reptin. Coomassie blue stained SDS-acrylamide gel of wt-reptin; lanes 1 and 2 are GST fusions of the glutathione-affinity purified recombinant protein; lane 3 is the precision protease eluted forms of reptin protein with the GST tag removed. (b-c) The effects of ADP on the thermostability of reptin. WT reptin was incubated without or with increasing concentrations of ligand (from 0-100  $\mu\text{M}$ ) and subjected to thermal denaturation in the presence of SyproB to measure unfolding transitions, as published previously. (b & c) ADP binds wt-reptin with low micromolar affinity. ADP binds to wt-reptin and increases thermal stability. The displacement of SYPRO orange from the protein by ADP is represented by the decrease in background fluorescence prior to the onset of the protein melting. (b) Background fluorescence at 298K as a function of ADP concentration (25°C). 7.5  $\mu\text{M}$  wt-reptin was titrated against 0 to 100  $\mu\text{M}$  ADP in 50 mM Tris-HCl, pH 8.0; 120 mM NaCl; 1 mM EDTA and 1 mM DTT. The solid line represents the best fit of the data to  $F = (F_{\text{max}} - F_{\text{min}}) / (1 + 10^{(\log \text{IC}_{50} - [\text{ADP}]) \cdot \text{Hill slope}})$ . Experiments were repeated in triplicate, mean values are reported and error bars show standard deviations. The melting curve of hexameric wt-reptin does not approximate to a two-state unfolding model when in the *apo* form. There is a very clear trend to increased thermal stability with increasing



concentrations of ADP. The end-point of melting for 7.5  $\mu\text{M}$  changes increases from 34.5 to 44  $^{\circ}\text{C}$  with addition of 100  $\mu\text{M}$  ADP. It was not possible to assign a single mid-point melting temperature from the first derivative of the melting curve for the apo protein and for data collected with low concentrations of ADP or fit a two-state unfolding model. At the highest concentration of ADP (100  $\mu\text{M}$ ) the melting curve is a much better approximation to a two-state unfolding model. It is very likely that both the total enthalpy of unfolding,  $\Delta H_u$ , and change in specific heat capacity on unfolding,  $\Delta C_p$ , is highly dependent on ADP occupancy across wt-reptin monomers. Unfolding is likely to be more complex and less cooperative when there is less than full occupancy. Sypro orange is an environmentally sensitive dye that associates with hydrophobic pockets of folded proteins. In our data there is a good correlation between background fluorescence before the onset of melting and the end of melting temperature at the different ADP concentrations. This can be explained by SYPRO orange associated with the native protein being displaced by ADP binding. SYPRO orange therefore acts as a fluorescent reporter ligand with low affinity for wt-reptin. (c) By plotting background fluorescence before the start of the melt (298K) against concentration of ADP we were able to derive an  $\text{IC}_{50}$  (Kaleidagraph V4.5.0). The  $\text{IC}_{50}$  of ADP for Wt-Reptin is  $10.6 \pm 5.6 \mu\text{M}$ .

### 3 Virtual Screening Materials and Methods

#### 3.1 Virtual Library Collation

The screening compound stock lists in SDF format of ChemBridge, Asinex, Maybridge, Enamine, LifeChemicals, Specs, InterBioScreen, ChemDiv and KeyOrganics were merged. Salts were stripped out using Sieve 3.1.0<sup>3</sup>, and duplicates removed using canonical SMILES string comparison via Open Babel 2.3.1. The supplied 2D coordinates were converted into 3D using Concord 4.08<sup>4</sup>. The virtual library was then filtered according to Oprea lead-like rules (H-bond acceptors  $\leq 9$ ; H-bond donors  $\leq 5$ ; MW  $\leq 460$ ;  $\text{cLogP} \geq -4.6 \leq 4.2$ ;  $\text{cLogS} \geq -5$ ; Number of rings  $\leq 4$ ; Number of rotatable bonds  $\leq 9$ <sup>5</sup>). This left 1,137,587 molecules. A multiconformer version of this virtual library was produced using Multiconf-DOCK<sup>6</sup>; an average of approximately 4.25 conformers per compound were generated depending on flexibility; this resulted in a virtual library containing a total of 4,840,093 conformers.

#### 3.2 Virtual screening workflow

The rigid-body docking program LIDAEUS<sup>1</sup> was used to dock the conformer virtual library of 4,480,093 molecules into the active site pocket of the pontin/reptin crystal structures. The results were ranked according to LIDAEUS score, the top 49,971 compounds from this list were then docked using Vina. Docked poses were scored using both Vina's internal scoring algorithm and X-Score 1.2<sup>7</sup>; these scores were used via a "rank-by-rank" consensus scheme<sup>8</sup> to create a ranked list. The top 4,974 compounds

were then docked using Autodock. The binding poses predicted by Autodock and Vina were compared via RMSD (using a previously described calculation method that is able to correctly compare symmetrical moieties<sup>9</sup>). Predicted binding poses that were similar ( $\text{RMSD} \leq 2.0 \text{ \AA}$ ) were also scored using DrugScore 1.2<sup>10</sup>. A final ranked list was prepared via a rank-by-rank scheme, taking the Vina, Autodock, X-Score and DrugScore rank positions into account. The binding mode of the top 100 hits were analyzed by visual inspection and subdivided into different classes based on structural similarity and representative examples of each class were purchased for testing (30 compounds in total).

The Multiconformer input parameters used in the virtual screening are shown below:

|                              |                                                         |
|------------------------------|---------------------------------------------------------|
| limit_max_ligands            | no                                                      |
| write_conformations          | yes                                                     |
| initial_skip                 | 0                                                       |
| max_conformations            | 10                                                      |
| calculate_rmsd               | yes                                                     |
| use_rmsd_reference_mol       | no                                                      |
| rmsd_window                  | 1.15                                                    |
| energy_window                | 25.0                                                    |
| min_anchor_size              | 4                                                       |
| number_confs_for_next_growth | 1                                                       |
| use_internal_energy          | yes                                                     |
| internal_energy_att_exp      | 6                                                       |
| internal_energy_rep_exp      | 12                                                      |
| internal_energy_dielectric   | 4                                                       |
| atom_model                   | all                                                     |
| vdw_defn_file                | Multiconf-DOCK/parameters/vdw_AMBER_parm99.defn         |
| flex_defn_file               | Multiconf-DOCK/parameters/flex_Multiconf-DOCK.defn      |
| flex_drive_file              | Multiconf-DOCK/parameters/flex_drive_Multiconf-DOCK.tbl |
| rmsd_reference_filename      | na                                                      |
| max_ligands                  | 999999999999                                            |

### 3.3 Redocking Control Experiments

The initial receptor structure used in redocking experiments was PDB 2XSZ. This structure was chosen because it was the highest resolution ligand-containing structure of Reptin available. The same protonation state was used throughout the whole process. The ADP ligand present in the protein crystal structure was redocked to verify that the docking programs to be used for the virtual screening were successfully able to correctly predict its binding conformation. Water molecules and other hetero atoms were removed and the program PDB2PQR 1.8<sup>11</sup> was used to assign position-optimised hydrogen atoms, utilising the additional PropKa<sup>12</sup> algorithm with a pH of 7.4 to predict protonation states. The MGLTools

1.5.4 utility `prepare_receptor4.py` was used to assign Gasteiger charges to atoms. Hydrogen atoms were assigned to ligand structures using OpenBabel 2.3.1<sup>13</sup>, utilising the `-p` option to predict the protonation states of functional groups at pH 7.4. The MGLTools utility `prepare_ligand4.py` was used to assign Gasteiger charges and rotatable bonds. As Vina 1.1.2<sup>14</sup> and Autodock 4.2.3<sup>15</sup> both use the same `pdbqt` format for their input, the same prepared files could be used for each. A grid box that encompassed the maximum dimensions of the ligand plus 12 Å in each direction was used. The starting translation and orientation of the ligand and the torsion angles of all rotatable bonds were set to random. The Autogrid grid point spacing was set at 0.2 Å. The Autodock parameter file specified 10 Lamarckian genetic algorithm runs, 2,000,000 energy evaluations and a population size of 300. Each docking program was used to automatically dock the ligand back into the pontin binding pocket and the results compared with the crystallographically determined binding mode via RMSD.

## 4 Synthesis and Characterization of Compounds

### 4.1 General Considerations

Chemicals and reagents were obtained from either Aldrich or Alfa-Aesar and were used as received unless otherwise stated. All reactions involving moisture sensitive reagents were performed in oven dried glassware under positive pressure of nitrogen. Dichloromethane (DCM) was obtained dry from a solvent purification system (MBraun, SPS-800).

Thin-layer chromatography was performed using glass plates coated with silica gel (with fluorescent indicator UV<sub>254</sub>) (Aldrich). Developed plates were air dried and analyzed under a UV lamp, Model UVGL-58 (Mineralight LAMP, Multiband UV<sub>254/365</sub> nm) and where necessary stained with potassium permanganate to aid identification.

Melting points were recorded in open capillaries using an Electrothermal 9100 melting point apparatus. Values are quoted to the nearest 1 °C and are uncorrected.

<sup>1</sup>H-NMR spectra were measured at room temperature (298 K) on a Bruker DPX 400 (<sup>1</sup>H = 400 MHz), Bruker Avance 300 (<sup>1</sup>H = 300.1 MHz) and Bruker Avance 500 (<sup>1</sup>H = 500 MHz) instruments. Deuterated solvents were used and <sup>1</sup>H NMR chemical shifts were internally referred to CHCl<sub>3</sub> (7.26 ppm) in chloroform-d<sub>1</sub> solution and to CD<sub>2</sub>HSO<sub>2</sub>CD<sub>3</sub> (2.50 ppm) in dimethylsulfoxide-d<sub>6</sub> solution. Chemical shifts are expressed as δ in unit of ppm.

<sup>13</sup>C-NMR spectra were recorded in the same conditions and in the same solvents using the DEPTQ pulse sequence mode on a Bruker DPX 400 (<sup>13</sup>C = 101 MHz), Bruker Avance 300 (<sup>13</sup>C = 75 MHz) and a Bruker Avance 500 (<sup>13</sup>C = 126 MHz). Data processing was carried out using MestReNova NMR (Mestrelab). In <sup>1</sup>H NMR, the multiplicity used for assignment is indicated by the following abbreviations: s = singlet, d = doublet, dd = doublet of doublets, dt = doublet of triplets, t = triplet, q = quadruplet, m = multiplet, br = broad. Signals of protons and carbons were assigned, as far as possible, by using the following two-dimensional NMR spectroscopy techniques: [<sup>1</sup>H, <sup>1</sup>H] COSY, [<sup>1</sup>H, <sup>13</sup>C] COSY (HSQC: Heteronuclear Single Quantum Coherence) and long range [<sup>1</sup>H, <sup>13</sup>C] COSY (HMBC: Heteronuclear Multiple Bond Connectivity). <sup>1</sup>H NMR were supplied by Chembridge for the selected purchased analogues.

Mass spectrometry (electrospray mode, ES) were recorded on a high performance orthogonal acceleration reflecting TOF mass spectrometer operating in positive and negative mode, coupled to a Waters 2975 HPLC.

Fourier Transform infra-red spectra (FT IR) were acquired on a Perkin Elmer paragon 1000 FT spectrophotometer or a Shimadzu IRAffinity-1 FT spectrophotometer with a Pike MIRacle™. Absorption maxima are reported in wavenumbers ( $\text{cm}^{-1}$ ).

## 4.2 General Procedures

### General Method A

Synthesis of the substituted oxazole system:

To polyphosphoric acid (~20 eq.) at 120 °C were added simultaneously the appropriate aminophenol (1 eq.) and a range of substituted benzoic acids (1 eq.). The resulting mixture was heated to 200 °C for 4 h. After cooling slightly, ice water was added to the reaction. The solution was neutralized by the slow addition of a saturated sodium hydrogen carbonate solution and the resulting precipitate was collected by filtration. Drying in a vacuum oven yielded the pure product.

### General Method B

Formation of the amide bond:

To a solution of the appropriate aniline (1 eq.) in DCM (1 mL/mmol) was added a range of carbonyl chlorides (2.5 eq.). The mixture was stirred for 10 minutes before addition of DIPEA (1.5 eq.) dropwise. The reaction was stirred at room temperature for 24-72 hours. The resulting precipitate was filtered and dried to yield the desired compound. Recrystallization from DCM afforded the product in high purity.

## 4.3 Experimental procedures

### 2-Chloro-5-(oxazolo[4,5-b]pyridin-2-yl)aniline (S40)

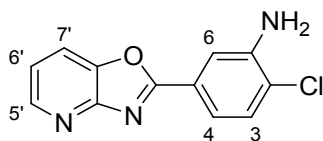

Prepared from 2-amino-3-hydroxypyridine (4.0 g, 36.3 mmol) using general method A. **S40** was recovered as a white solid (4.9 g, 55%). **mp** 205-208 °C; **IR** (solid)  $\nu_{\text{max}}$ : 3453 (NH), 3345 (NH), 1614, 1406, 1261, 781 (C-Cl); **<sup>1</sup>H NMR** (500 MHz, Chloroform-*d*)  $\delta$  8.57 (dd,  $J = 4.9, 1.5$  Hz, 1H, C5'-H), 7.84 (dd,  $J = 8.1, 1.5$  Hz, 1H, C7'-H), 7.73 (d,  $J = 2.0$  Hz, 1H, C6-H), 7.61 (dd,  $J = 8.3, 2.0$  Hz, 1H, C4-H), 7.40 (d,  $J = 8.3$  Hz, 1H, C3-H), 7.29 (dd,  $J = 8.1, 4.9$  Hz, 1H, C6'-H), 4.30 (br s, 2H, NH<sub>2</sub>); **<sup>13</sup>C NMR** (126 MHz, Chloroform-*d*)  $\delta$  165.3 (C2'), 156.4 (C4b), 146.9 (C5'), 143.6 (C1), 143.2 (C5b), 130.2 (C3), 125.9 (C5), 123.6 (C2), 120.3 (C6'), 118.4 (C4), 118.3 (C7'), 114.8 (C6); ***m/z*** (ES<sup>+</sup>) 246.04 ([M+H]<sup>+</sup>, 100 %); **HRMS** (ES<sup>+</sup>) Calcd for C<sub>12</sub>H<sub>9</sub>ON<sub>3</sub>Cl [M+H]<sup>+</sup>: 246.0429, found 246.0431. Data is in accordance with the literature<sup>16</sup>.

### 5-Chloro-2-(oxazolo[4,5-b]pyridin-2-yl)aniline (**S41**)

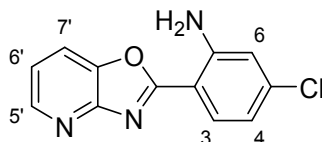

Prepared from 2-amino-3-hydroxypyridine (600 mg, 5.45 mmol) using general method A. **S41** was recovered as white solid (690 mg, 52%). **mp** 256-259 °C; **IR** (solid)  $\nu_{\text{max}}$ : 3402 (NH), 3310 (NH), 3201, 1612, 1543, 1481, 1404, 772 (C-Cl); **<sup>1</sup>H NMR** (500 MHz, DMSO-*d*<sub>6</sub>)  $\delta$  8.51 (d,  $J = 5.2$  Hz, 1H, C5'-H), 8.19 (d,  $J = 8.2$  Hz, 1H, C7'-H), 7.94 (d,  $J = 8.3$  Hz, 1H, C3-H), 7.50 – 7.35 (m, 3H, C6'-H, NH<sub>2</sub>), 7.01 (d,  $J = 6.8$  Hz, 1H, C6-H), 6.73 (d,  $J = 8.3$  Hz, 1H, C4-H); **<sup>13</sup>C NMR** (126 MHz, DMSO-*d*<sub>6</sub>)  $\delta$  164.2 (C2'), 155.2 (C4b), 150.3 (C1), 146.2 (C5'), 141.1 (C5b), 138.1 (C5), 129.9 (C3), 120.5 (C6'), 118.5 (C7'), 115.6 (C4), 115.1 (C6), 104.6 (C2); ***m/z*** (ES<sup>+</sup>) 246.04 ([M+H]<sup>+</sup>, 100%); **HRMS** (ES<sup>+</sup>) Calcd for C<sub>12</sub>H<sub>9</sub>ON<sub>3</sub>Cl [M+H]<sup>+</sup>: 246.0429, found 246.0430.

### 3-(Oxazolo[4,5-b]pyridin-2-yl)aniline (**S42**)

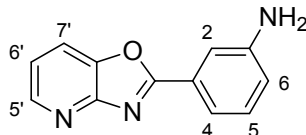

Prepared from 2-amino-3-hydroxypyridine (300 mg, 2.70 mmol) using general method A. **S42** was recovered as an off-white solid (500 mg, 88%). **mp** 186-189 °C; **<sup>1</sup>H NMR** (300 MHz, DMSO-*d*<sub>6</sub>)  $\delta$  8.52 (dd,  $J = 4.9, 1.5$  Hz, 1H, C5'-H), 8.21 (dd,  $J = 8.1, 1.5$  Hz, 1H, C7'-H), 7.48 (t,  $J = 2.0$ , 1H, C2-H), 7.44 (dd,  $J = 8.1, 4.9$  Hz, 1H, C6'-H), 7.38 (ddd,  $J = 7.6, 1.7, 1.1$  Hz, 1H, C4-H), 7.26 (t,  $J = 7.8$  Hz, 1H, C5-H), 6.84 (ddd,  $J = 8.0, 2.4, 1.1$  Hz, 1H, C6-H), 5.55 (br s, 2H, NH<sub>2</sub>); **<sup>13</sup>C NMR** (75 MHz, DMSO-*d*<sub>6</sub>)  $\delta$  165.6 (C2'), 155.6 (C4b), 149.5 (C1), 146.4 (C5'), 142.6 (C5b), 129.9 (C5), 126.3 (C3), 120.5 (C6'), 118.9 (C7'), 118.1 (C6), 114.9

(C4), 112.3 (C2);  $m/z$  ( $ES^+$ ) 218.08 ( $[M+H]^+$ , 100 %); **HRMS** ( $ES^+$ ) Calcd for  $C_{12}H_{10}ON_3$   $[M+H]^+$ : 212.0818, found 212.0818. Data is in accordance with the literature<sup>16</sup>.

#### 4-(Oxazolo[4,5-b]pyridin-2-yl)aniline (**S43**)

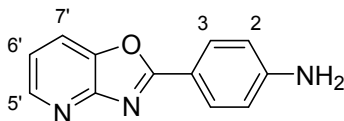

Prepared from 2-amino-3-hydroxypyridine (600 mg, 5.45 mmol) using general method A. **S43** was recovered as pale yellow solid (906 mg, 79%). **mp** 257-259 °C (lit. 252-254 °C<sup>17</sup>); **IR** (solid)  $\nu_{max}$ : 3395 (NH), 3310 (NH), 3202, 1605, 1489, 1404; **<sup>1</sup>H NMR** (500 MHz, DMSO- $d_6$ )  $\delta$  8.41 (dd,  $J$  = 4.9, 1.3 Hz, 1H, C5'-H), 8.07 (dd,  $J$  = 8.1, 1.3 Hz, 1H, C7'-H), 7.91 (d,  $J$  = 8.6 Hz, 2H, C3-H), 7.31 (dd,  $J$  = 8.1, 4.9 Hz, 1H, C6'-H), 6.71 (d,  $J$  = 8.6 Hz, 2H, C2-H), 6.17 (br s, 2H, NH<sub>2</sub>); **<sup>13</sup>C NMR** (126 MHz, DMSO- $d_6$ )  $\delta$  166.0 (C2'), 156.4 (C4b), 153.4 (C1), 145.7 (C5'), 142.3 (C5b), 129.6 (C3), 119.3 (C6'), 117.8 (C7'), 113.5 (C3), 111.7 (C4);  $m/z$  ( $ES^+$ ) 212.0 ( $[M+H]^+$ , 100%); **HRMS** ( $ES^+$ ) Calcd for  $C_{12}H_{10}ON_3$   $[M+H]^+$ : 212.0818, found 212.0818. Data is in accordance with the literature<sup>17</sup>.

#### 2-Fluoro-5-(oxazolo[4,5-b]pyridin-2-yl)aniline (**S44**)

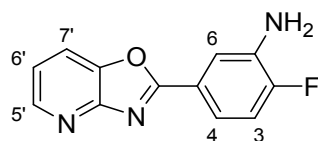

Prepared from 2-amino-3-hydroxypyridine (75 mg, 0.68 mmol) using general method A. **S44** was recovered as an off-white solid (65 mg, 50%). **mp** 214-216 °C; **IR** (solid)  $\nu_{max}$ : 3464 (NH), 3318 (NH), 3194, 3039, 1613, 1497, 1404, 1173 (C-F); **<sup>1</sup>H NMR** (400 MHz, DMSO- $d_6$ )  $\delta$  8.52 (dd,  $J$  = 4.9, 1.4 Hz, 1H, C5'-H), 8.21 (dd,  $J$  = 8.2, 1.4 Hz, 1H, C7'-H), 7.69 (dd,  $J$  = 8.6, 2.2 Hz, 1H, C6-H), 7.51 – 7.35 (m, 2H, C6'-H, C4-H), 7.25 (dd,  $J$  = 11.3, 8.4 Hz, 1H, C3-H), 5.65 (br s, 2H, NH<sub>2</sub>); **<sup>13</sup>C NMR** (101 MHz, DMSO- $d_6$ )  $\delta$  164.8 (C2'), 155.6 (C4b), 153.1 (d,  $J$  = 245.3 Hz, C2), 146.4 (C5'), 142.7 (C5b), 137.5 (d,  $J$  = 13.8 Hz, C1), 122.4 (d,  $J$  = 2.7 Hz, C5), 120.53 (C6'), 118.9 (C7'), 116.0 (d,  $J$  = 19.8 Hz, C3), 115.8 (d,  $J$  = 7.4 Hz, C4), 115.0 (d,  $J$  = 6.3 Hz, C6);  $m/z$  ( $ES^+$ ) 230.07 ( $[M+H]^+$ , 100 %); **HRMS** ( $ES^+$ ) Calcd for  $C_{12}H_9ON_3F$   $[M+H]^+$ : 230.0724, found 230.0725.

### 2-Bromo-5-(oxazolo[4,5-b]pyridin-2-yl)aniline (S45)

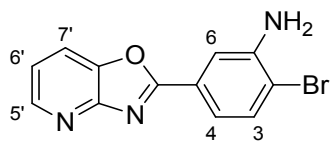

Prepared from 2-amino-3-hydroxypyridine (600 mg, 5.45 mmol) using general method A. **S45** was recovered as a pale brown solid (1.38 g, 87%). **mp** 211-212 °C; **IR** (solid)  $\nu_{\max}$ : 3418 (NH), 3287 (NH), 3171, 1736, 1620, 1597, 1543, 1404; **<sup>1</sup>H NMR** (300 MHz, DMSO-*d*<sub>6</sub>)  $\delta$  8.54 (dd, *J* = 4.9, 1.4 Hz, 1H, C5'-H), 8.23 (dd, *J* = 8.2, 1.4 Hz, 1H, C7'-H), 7.70 (d, *J* = 2.1 Hz, 1H, C6-H), 7.61 (d, *J* = 8.2 Hz, 1H, C3-H), 7.46 (dd, *J* = 8.2, 4.9 Hz, 1H, C6'-H), 7.31 (dd, *J* = 8.2, 2.1 Hz, 1H, C4-H), 5.79 (br s, 2H, NH<sub>2</sub>); **<sup>13</sup>C NMR** (75 MHz, DMSO-*d*<sub>6</sub>)  $\delta$  164.7 (C2'), 155.5 (C4b), 146.7 (C1), 146.5 (C5'), 142.7 (C5b), 133.3 (C3), 125.8 (C5), 120.7 (C6'), 119.0 (C7'), 115.9 (C4), 113.5 (C6), 111.8 (C2); ***m/z*** (ES<sup>+</sup>) 289.99 ([<sup>79</sup>BrM+H]<sup>+</sup>, 100 %), 291.99 ([<sup>81</sup>BrM+H]<sup>+</sup>, 100%); **HRMS** (ES<sup>+</sup>) Calcd for C<sub>12</sub>H<sub>9</sub>ON<sub>3</sub>Br [M+H]<sup>+</sup>: 289.9924, found 289.9927.

### 3-(oxazolo[4,5-b]pyridin-2-yl)phenol (S46)

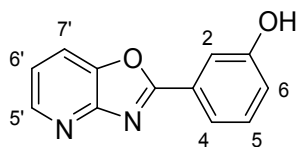

Prepared from 2-amino-3-hydroxypyridine (55 mg, 0.5 mmol) using general method A. **S46** was recovered as a white solid (75 mg, 71%). **mp** 198-201 °C (lit. 203-204 °C<sup>18</sup>); **IR** (solid)  $\nu_{\max}$ : 3030 (OH), 2922 (OH), 2603, 1601, 1551, 1449, 1294, 887, 781; **<sup>1</sup>H NMR** (500 MHz, DMSO-*d*<sub>6</sub>)  $\delta$  10.06 (br s, 1H, OH), 8.54 (dd, *J* = 4.9, 1.4 Hz, 1H, C5'-H), 8.24 (dd, *J* = 8.1, 1.4 Hz, 1H, C7'-H), 7.69 (d, *J* = 7.9 Hz, 1H, C4-H), 7.63 (dd, *J* = 2.5, 1.6 Hz, 1H, C2-H), 7.50 – 7.40 (m, 2H, C6'-H, C5-H), 7.07 (ddd, *J* = 8.2, 2.5, 1.0 Hz, 1H, C6-H); **<sup>13</sup>C NMR** (126 MHz, DMSO-*d*<sub>6</sub>)  $\delta$  164.9 (C2'), 158.0 (C1), 155.5 (C4b), 146.6 (C5'), 142.8 (C5b), 130.7 (C5), 127.0 (C3), 120.8 (C6'), 120.0 (C6), 119.1 (C7'), 118.5 (C4), 114.0 (C2); ***m/z*** (ES<sup>+</sup>) 213.06 ([M+H]<sup>+</sup>, 100 %); **HRMS** (ES<sup>+</sup>) Calcd for C<sub>12</sub>H<sub>9</sub>O<sub>2</sub>N<sub>2</sub> [M+H]<sup>+</sup>: 213.0659, found 213.0659. Data is in accordance with the literature<sup>18</sup>.

### 2-Methyl-5-(oxazolo[4,5-b]pyridin-2-yl)aniline (S47)

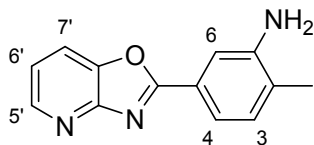



Prepared from 2-amino-3-hydroxypyridine (500 mg, 4.54 mmol) using general method A. **S47** was recovered as a pale brown solid (716 mg, 71%). **mp** 171-173 °C; **IR** (solid)  $\nu_{\max}$ : 3426 (NH), 3325 (NH), 3055, 1736, 1620, 1551, 1497, 1404, 1234, 779; **<sup>1</sup>H NMR** (500 MHz, DMSO-*d*<sub>6</sub>)  $\delta$  8.51 (dd, *J* = 4.9, 1.4 Hz, 1H, C5'-H), 8.19 (dd, *J* = 8.1, 1.4 Hz, 1H, C7'-H), 7.53 (d, *J* = 1.8 Hz, 1H, C6-H), 7.42 (dd, *J* = 8.1, 4.9 Hz, 1H, C6'-H), 7.36 (dd, *J* = 7.6, 1.8 Hz, 1H, C4-H), 7.17 (d, *J* = 7.6 Hz, 1H, C3-H), 5.33 (br s, 2H, NH<sub>2</sub>), 2.15 (s, 3H, CH<sub>3</sub>); **<sup>13</sup>C NMR** (126 MHz, DMSO-*d*<sub>6</sub>)  $\delta$  165.8 (C2'), 155.8 (C4b), 147.5 (C1), 146.3 (C5'), 142.5 (C5b), 130.8 (C3), 126.6 (C2), 124.0 (C5), 120.3 (C6'), 118.7 (C7'), 115.3 (C4), 112.3 (C6), 17.7 (CH<sub>3</sub>); ***m/z*** (ES<sup>+</sup>) 226.09 ([M+H]<sup>+</sup>, 100 %); **HRMS** (ES<sup>+</sup>) Calcd for C<sub>12</sub>H<sub>12</sub>ON<sub>3</sub> [M+H]<sup>+</sup>: 226.0975, found 226.0974. <sup>1</sup>H & <sup>13</sup>C NMR not in accordance with literature<sup>16</sup>

#### 4-Amino-2-(oxazolo[4,5-b]pyridin-2-yl)phenol (**S48**)

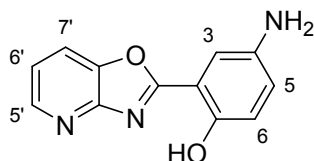

Prepared from 2-amino-3-hydroxypyridine (600 mg, 5.45 mmol) using general method A. **S48** was recovered as dark yellow solid (690 mg, 49%). **mp** 191-193 °C (lit. 181-183 °C<sup>19</sup>); **IR** (solid)  $\nu_{\max}$ : 3426 (NH), 3310 (NH), 3202 (OH), 1620, 1535, 1497, 1404, 779; **<sup>1</sup>H NMR** (500 MHz, DMSO-*d*<sub>6</sub>)  $\delta$  10.19 (br s, 1H, OH), 8.55 (dd, *J* = 4.9, 1.4 Hz, 1H, C5'-H), 8.27 (dd, *J* = 8.1, 1.4 Hz, 1H, C7'-H), 7.48 (dd, *J* = 8.1, 4.9 Hz, 1H, C6'-H), 7.27 (d, *J* = 2.3 Hz, 1H, C3-H), 6.88 (s, 2H, C5-H, C6-H), 5.02 (br s, 2H, NH<sub>2</sub>); **<sup>13</sup>C NMR** (126 MHz, DMSO-*d*<sub>6</sub>)  $\delta$  165.2 (C2'), 153.9 (C4b), 149.7 (C1), 146.6 (C5'), 141.8 (C4), 141.4 (C5b), 122.3 (C5), 120.8 (C6'), 119.0 (C7'), 117.9 (C6), 110.4 (C3), 109.5 (C2); ***m/z*** (ES<sup>+</sup>) 228.07 ([M+H]<sup>+</sup>, 100%); **HRMS** (ES<sup>+</sup>) Calcd for C<sub>12</sub>H<sub>10</sub>O<sub>2</sub>N<sub>3</sub> [M+H]<sup>+</sup>: 228.0768, found 228.0768.

#### 5-(Benzo[d]oxazol-2-yl)-2-bromoaniline (**S49**)

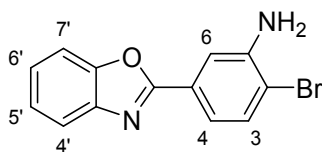

Prepared from 2-aminophenol (545 mg, 5.00 mmol) using general method A. **S49** was recovered as an off-white solid (653 mg, 45%). **mp** 198-200 °C; **IR** (solid)  $\nu_{\max}$ : 3449 (NH), 3310 (NH), 3179, 1612, 1543, 1435, 1242, 1065, 741; **<sup>1</sup>H NMR** (500 MHz, DMSO-*d*<sub>6</sub>)  $\delta$  7.81 – 7.75 (m, 2H, C4'-H, C7'-H), 7.66 (d, *J* = 2.1

Hz, 1H, C6-H), 7.57 (d,  $J = 8.2$  Hz, 1H, C3-H), 7.46 – 7.37 (m, 2H, C5'-H, C6'-H), 7.27 (dd,  $J = 8.2, 2.1$  Hz, 1H, C4-H), 5.75 (br s, 2H, NH<sub>2</sub>); <sup>13</sup>C NMR (126 MHz, DMSO-*d*<sub>6</sub>)  $\delta$  162.2 (C2'), 150.1 (C4b), 146.6 (C1), 141.5 (C5b), 133.2 (C3), 126.3 (C5), 125.5 (C5'), 124.9 (C6'), 119.8 (C4'), 115.7 (C4), 113.3 (C6), 111.0 (C2), 110.9 (C7');  $m/z$  (ES<sup>+</sup>) 288.99 ([<sup>79</sup>BrM+H]<sup>+</sup>, 100 %), 290.99 ([<sup>81</sup>BrM+H]<sup>+</sup>, 100%); HRMS (ES<sup>+</sup>) Calcd for C<sub>13</sub>H<sub>10</sub>ON<sub>2</sub>Br [M+H]<sup>+</sup>: 288.9971, found 288.9975.

***N*-(2-chloro-5-(oxazolo[4,5-*b*]pyridin-2-yl)phenyl)-[1,1'-biphenyl]-4-carboxamide (1)**

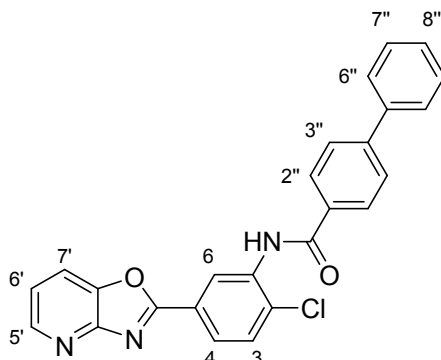

Prepared from **S40** (300 mg, 1.42 mmol) using general method B. **1** recovered after recrystallization (DCM) as a white solid (346 mg, 57%). **mp** 254-256 °C; IR (KBr)  $\nu_{\max}$ : 3416 (NH), 3275, 3059, 3033, 1653 (C=O); <sup>1</sup>H NMR (400 MHz, DMSO-*d*<sub>6</sub>)  $\delta$  10.39 (br s, 1H, NH), 8.61 – 8.53 (m, 2H, C5'-H, C6'-H), 8.29 (dd,  $J = 8.2, 1.5$  Hz, 1H, C7'-H), 8.19 – 8.11 (m, 3H, C4-H, 2 × C2''-H), 7.93 – 7.83 (m, 3H, C3-H, 2 × C3''-H), 7.82 – 7.75 (m, 2H, 2 × C6''-H), 7.57 – 7.46 (m, 3H, C6'-H, 2 × C7''-H), 7.49 – 7.39 (m, 1H, C8''-H); <sup>13</sup>C NMR (101 MHz, DMSO-*d*<sub>6</sub>)  $\delta$  165.3 (CO), 163.7 (C2'), 155.4 (C4b), 146.8 (C5'), 143.6 (C4''), 143.0 (C5b), 139.0 (C5''), 136.2 (C1), 133.4 (C2), 132.5 (C1''), 131.0 (C3), 129.1 (2 × C7''), 128.6 (2 × C2''), 128.3 (C8''), 127.0 (2 × C6''), 126.8 (2 × C3''), 126.6 (C6), 126.1 (C4), 125.2 (C5), 121.1 (C6'), 119.3 (C7');  $m/z$  (ES<sup>-</sup>) 423.82 ([M-H]<sup>-</sup>, 100 %); HRMS (ES<sup>-</sup>) Calcd for C<sub>25</sub>H<sub>15</sub>ClN<sub>3</sub>O<sub>2</sub> [M-H]<sup>-</sup>: 424.0839, found 424.0853.

***N*-(5-chloro-2-(oxazolo[4,5-*b*]pyridin-2-yl)phenyl)-[1,1'-biphenyl]-4-carboxamide (7)**

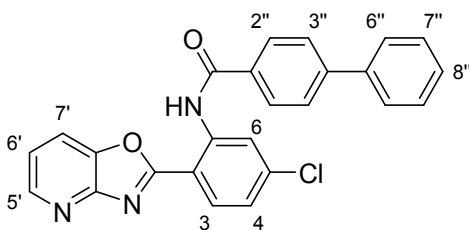

Prepared from **S41** (550 mg, 2.6 mmol) using the general method B. **7** recovered after recrystallization (DCM) as a pale yellow solid (185 mg, 17%). **mp** 254-256 °C IR (KBr)  $\nu_{\max}$ : 3408 (NH), 3072, 3032, 1684

(C=O), 1590;  $^1\text{H NMR}$  (500 MHz, Chloroform-*d*)  $\delta$  12.64 (br s, 1H, NH), 9.21 (d,  $J = 2.0$  Hz, 1H, C6-H), 8.63 (dd,  $J = 4.9, 1.4$  Hz, 1H, C5'-H), 8.36 (d,  $J = 8.3$  Hz, 2H, 2  $\times$  C2''-H), 8.20 (d,  $J = 8.5$  Hz, 1H, C3-H), 7.92 (dd,  $J = 8.1, 1.4$  Hz, 1H, C7'-H), 7.86 (d,  $J = 8.3$  Hz, 2H, 2  $\times$  C3''-H), 7.73 – 7.66 (m, 2H, 2  $\times$  C6''-H), 7.49 (dd,  $J = 8.3, 6.8$  Hz, 2H, 2  $\times$  C7''-H), 7.44 – 7.39 (m, 1H, C8''-H), 7.38 (dd,  $J = 8.1, 4.9$  Hz, 1H, C6'-H), 7.23 (dd,  $J = 8.5, 2.0$  Hz, 1H, C4-H);  $^{13}\text{C NMR}$  (126 MHz, Chloroform-*d*)  $\delta$  166.1 (CO), 164.0 (C2'), 154.9 (C4b), 147.3 (C5'), 145.2 (C4''), 141.8 (C5b), 141.0 (C5), 140.6 (C1), 140.1 (C5''), 133.0 (C1''), 129.4 (C3), 129.0 (2  $\times$  C7''), 128.5 (2  $\times$  C2''), 128.2 (C8''), 127.8 (2  $\times$  C3''), 127.4 (2  $\times$  C6''), 123.6 (C4), 121.0 (C6'), 120.9 (C6), 118.6 (C7'), 110.8 (C2);  $m/z$  (ES<sup>+</sup>) 447.86 [M+Na]<sup>+</sup>; **HRMS** (ES<sup>+</sup>) Calcd for C<sub>25</sub>H<sub>16</sub>ClN<sub>3</sub>O<sub>2</sub>Na [M+Na]<sup>+</sup>: 448.0829, found 448.0826.

### ***N*-(3-(oxazolo[4,5-*b*]pyridin-2-yl)phenyl)-[1,1'-biphenyl]-4-carboxamide (8)**

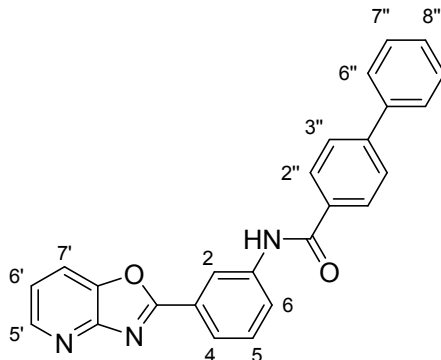

Prepared from **S42** (150 mg, 0.71 mmol) using the general method B. **8** recovered after recrystallization (DCM) as a white solid (33 mg, 12%). **mp** 261-264 °C; **IR** (KBr)  $\nu_{\text{max}}$ : 3440 (NH), 2962, 2924, 1649 (C=O), 1527;  $^1\text{H NMR}$  (300 MHz, DMSO-*d*<sub>6</sub>)  $\delta$  10.63 (br s, 1H, NH), 8.87 (t,  $J = 1.9$  Hz, 1H, C2-H), 8.56 (dd,  $J = 4.9, 1.4$  Hz, 1H, C5'-H), 8.27 (dd,  $J = 8.2, 1.4$  Hz, 1H, C7'-H), 8.19 – 8.06 (m, 3H, C6-H, 2  $\times$  C2''-H), 8.04 – 7.93 (m, 1H, C4-H), 7.92 – 7.82 (m, 2H, 2  $\times$  C3''-H), 7.82 – 7.72 (m, 2H, 2  $\times$  C6''-H), 7.64 (t,  $J = 8.0$  Hz, 1H, C5-H), 7.57 – 7.36 (m, 4H, C6'-H, C8''-H, 2  $\times$  C7''-H);  $^{13}\text{C NMR}$  (75 MHz, DMSO-*d*<sub>6</sub>)  $\delta$  165.5 (CO), 164.8 (C2'), 155.5 (C4b), 146.6 (C5'), 143.4 (C4''), 142.8 (C5b), 140.2 (C1), 139.1 (C5''), 133.3 (C1''), 129.9 (C5), 129.1 (2  $\times$  C7''), 128.5 (2  $\times$  C2''), 128.2 (C8''), 127.0 (2  $\times$  C6''), 126.7 (2  $\times$  C3''), 126.3 (C3), 124.1 (C6), 122.8 (C4), 120.9 (C6'), 119.1 (CH), 119.0 (CH);  $m/z$  (ES<sup>-</sup>) 389.84 ([M-H]<sup>-</sup>, 100 %); **HRMS** (ES<sup>-</sup>) Calcd for C<sub>25</sub>H<sub>16</sub>N<sub>3</sub>O<sub>2</sub> [M-H]<sup>-</sup>: 390.1245, found 390.1243.

### ***N*-(4-(oxazolo[4,5-*b*]pyridin-2-yl)phenyl)-[1,1'-biphenyl]-4-carboxamide (9)**

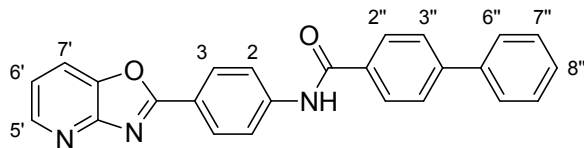

Prepared from **S43** (300 mg, 1.42 mmol) using general method B. **9** recovered after recrystallization (DCM) as an off-white solid (202 mg, 36%). **mp** 322-325 °C; **IR** (KBr)  $\nu_{\max}$ : 3358 (NH), 3067, 3056, 1672 (C=O), 1599; **<sup>1</sup>H NMR** (400 MHz, DMSO-*d*<sub>6</sub>)  $\delta$  10.70 (br s, 1H, NH), 8.54 (dd, *J* = 4.9, 1.4 Hz, 1H, C5'-H), 8.27 (d, *J* = 8.8 Hz, 2H, 2 × C3-H), 8.23 (dd, *J* = 8.1, 1.4 Hz, 1H, C7'-H), 8.17 – 8.06 (m, 4H, 2 × C2-H, 2 × C2''-H) 7.91 – 7.84 (m, 2H, 2 × C3''-H), 7.83 – 7.72 (m, 2H, 2 × C6''-H), 7.57 – 7.49 (m, 2H, 2 × C7''-H), 7.48 – 7.38 (m, 2H, C6'-H, C8''-H); **<sup>13</sup>C NMR** (101 MHz, DMSO-*d*<sub>6</sub>)  $\delta$  165.7 (CO), 164.8 (C2'), 155.8 (C4b), 146.4 (C5'), 143.5 (C), 143.4 (C), 142.7 (C5b), 139.0 (C5''), 133.3 (C1''), 129.1 (2 × C7''), 128.6 (2 × CH), 128.6 (2 × CH), 128.3 (C8''), 127.0 (2 × C6''), 126.7 (2 × C3''), 120.6 (C4), 120.5 (C6'), 120.3 (2 × C2), 118.8 (C7'); ***m/z*** (ES) 389.91 ([M-H]<sup>-</sup>, 100 %); **HRMS** (ES) Calcd for C<sub>25</sub>H<sub>16</sub>N<sub>3</sub>O<sub>2</sub> [M-H]<sup>-</sup>: 390.1234, found 390.1243.

#### ***N*-(2-fluoro-5-(oxazolo[4,5-*b*]pyridin-2-yl)phenyl)-[1,1'-biphenyl]-4-carboxamide (10)**

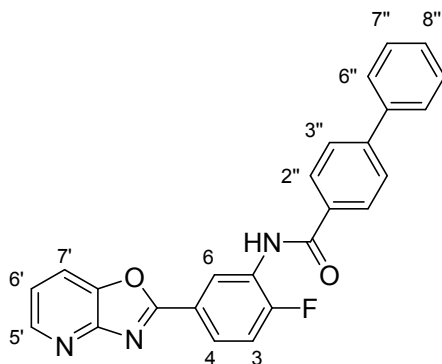

Prepared from **S44** (51 mg, 0.22 mmol) using general method B. **10** recovered after recrystallization (DCM) as a white solid (75 mg, 83%). **mp** 230-232 °C; **IR** (solid)  $\nu_{\max}$ : 3441 (NH), 3040, 1674 (C=O), 1520, 1404, 1250 (C-F); **<sup>1</sup>H NMR** (400 MHz, DMSO-*d*<sub>6</sub>)  $\delta$  10.47 (br s, 1H, NH), 8.65 (dd, *J* = 7.3, 2.3 Hz, 1H, C6-H), 8.57 (dd, *J* = 4.9, 1.4 Hz, 1H, C5'-H), 8.28 (dd, *J* = 8.2, 1.4 Hz, 1H, C7'-H), 8.20 – 8.15 (m, 1H, C4-H), 8.13 (d, *J* = 8.4 Hz, 2H, 2 × C2''-H), 7.94 – 7.83 (m, 2H, 2 × C3''-H), 7.83 – 7.74 (m, 2H, 2 × C6''-H), 7.62 (dd, *J* = 10.2, 8.7 Hz, 1H, C3-H), 7.58 – 7.37 (m, 4H, C6'-H, 2 × C7''-H, C8''-H); **<sup>13</sup>C NMR** (101 MHz, DMSO-*d*<sub>6</sub>)  $\delta$  165.3 (CO), 163.9 (C2'), 157.8 (d, *J* = 254.7 Hz, C2), 155.5 (C4b), 146.67 (C5'), 143.6 (C4''), 142.9 (C5b), 139.0 (C5''), 132.4 (C1''), 129.1 (2 × C7''), 128.7 (2 × C2''), 128.3 (C8''), 127.1 (C1), 127.0 (2 × C6''), 126.7 (2 × C3''), 126.3 (d, *J* = 9.1 Hz, C4), 125.7 (C6), 122.4 (d, *J* = 3.0 Hz, C5), 120.9 (C6'), 119.2 (C7'),

117.4 (d,  $J = 21.6$  Hz, C3);  $m/z$  ( $ES^+$ ) 410.12 ( $[M+H]^+$ , 100 %); **HRMS** ( $ES^+$ ) Calcd for  $C_{25}H_{17}FN_3O_2$   $[M+H]^+$ : 410.1299, found 410.1299.

***N*-(2-bromo-5-(oxazolo[4,5-*b*]pyridin-2-yl)phenyl)-[1,1'-biphenyl]-4-carboxamide (11 or Liddean)**

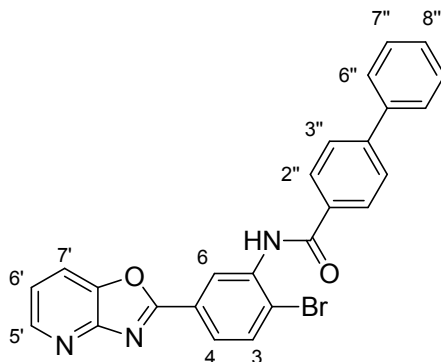

Prepared from **S45** (300 mg, 1.04 mmol) using general method B. **Liddean** recovered after recrystallization (DCM) as a white solid (200 mg, 41%). **mp** 237-240 °C; **IR** (KBr)  $\nu_{max}$ : 3460 (NH), 3271, 2666, 1653 (C=O), 1521;  **$^1H$  NMR** (500 MHz,  $DMSO-d_6$ )  $\delta$  10.34 (br s, 1H, NH), 8.58 (dd,  $J = 4.8, 1.4$  Hz, 1H, C5'-H), 8.49 (d,  $J = 2.0$  Hz, 1H, C6-H), 8.29 (dd,  $J = 8.1, 1.4$  Hz, 1H, C7'-H), 8.18 – 8.11 (m, 2H, 2  $\times$  C2''-H), 8.07 (dd,  $J = 8.4, 2.1$  Hz, 1H, C4-H), 8.03 (d,  $J = 8.4$  Hz, 1H, C3-H), 7.93 – 7.86 (m, 2H, 2  $\times$  C3''-H), 7.79 (m, 2H, 2  $\times$  C6''-H), 7.56 – 7.47 (m, 3H, C6'-H, 2  $\times$  C7''-H), 7.47 – 7.40 (m, 1H, C8''-H);  **$^{13}C$  NMR** (126 MHz,  $DMSO-d_6$ )  $\delta$  165.2 (CO), 163.8 (C2'), 155.4 (C4b), 146.9 (C5'), 143.7 (C4''), 143.0 (C5b), 139.1 (C5''), 137.6 (C1), 134.2 (C3), 132.5 (C1''), 129.1 (2  $\times$  C7''), 128.5 (2  $\times$  C2''), 128.3 (C8''), 127.0 (2  $\times$  C6''), 126.9 (C6), 126.9 (2  $\times$  C3''), 126.4 (C4), 125.8 (C5), 124.9 (C2), 121.2 (C6'), 119.4 (C7');  $m/z$  ( $ES^-$ ) 467.81 ( $[^{79}BrM-H]^+$ , 100 %), 469.81 ( $[^{81}BrM-H]^+$ , 100%); **HRMS** ( $ES^-$ ) Calcd for  $C_{25}H_{15}O_2N_3Br$   $[M-H]^-$ : 468.0348, found 468.0351.

***N*-(3-(oxazolo[4,5-*b*]pyridin-2-yl)phenyl)-[1,1'-biphenyl]-4-sulfonamide (12)**

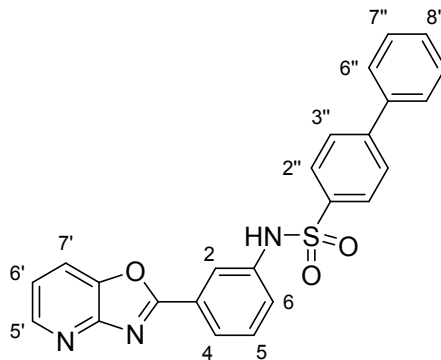

Prepared from **S42** (85 mg, 0.4 mmol) using the general method B. **12** recovered after recrystallization (DCM) as a white solid (120 mg, 70%). **mp** 193-195 °C; **IR** (KBr)  $\nu_{max}$ : 3067 (NH), 2893, 1551, 1404, 1337

(S=O), 1157 (S=O), 945, 777, 762;  $^1\text{H NMR}$  (500 MHz, DMSO- $d_6$ )  $\delta$  10.82 (br s, 1H, NH), 8.55 (dd,  $J = 4.8$ , 1.4 Hz, 1H, C5'-H), 8.26 (dd,  $J = 8.2$ , 1.4 Hz, 1H, C7'-H), 8.07 (t,  $J = 1.9$  Hz, 1H, C2-H), 7.94 – 7.83 (m, 5H, C4-H, 2  $\times$  C2''-H, 2  $\times$  C3''-H), 7.71 – 7.64 (m, 2H, 2  $\times$  C6''-H), 7.54 (t,  $J = 8.0$  Hz, 1H, C5-H), 7.49 – 7.43 (m, 4H, C6'-H, C6-H, 2  $\times$  C7''-H), 7.43 – 7.36 (m, 1H, C8''-H);  $^{13}\text{C NMR}$  (126 MHz, DMSO- $d_6$ )  $\delta$  164.2 (C2'), 155.3 (C4b), 146.7 (C5'), 144.6 (C4''), 142.8 (C5b), 138.8 (C1), 138.1 (C), 138.0 (C), 130.6 (C5), 129.1 (2  $\times$  C7''), 128.7 (C8''), 127.6 (2  $\times$  CH), 127.4 (2  $\times$  CH), 127.1 (2  $\times$  C6''), 126.9 (C3), 123.5 (C6), 123.2 (C4), 121.0 (C6'), 119.3 (C7'), 118.2 (C2);  $m/z$  (ES $^+$ ) 428.10 ([M+H] $^+$ , 100 %); **HRMS** (ES $^+$ ) Calcd for C<sub>24</sub>H<sub>18</sub>O<sub>3</sub>N<sub>3</sub>S [M+H] $^+$ : 428.1063, found 428.1063.

### 3-(Oxazolo[4,5-b]pyridin-2-yl)phenyl [1,1'-biphenyl]-4-carboxylate (**13**)

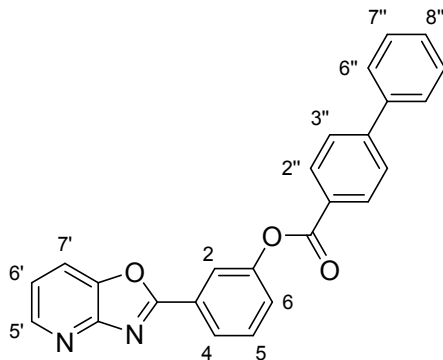

Prepared from **S46** (85 mg, 0.4 mmol) using the general method B. **13** recovered after recrystallization (DCM) as a white solid (95 mg, 61%). **mp** 185-187 °C; **IR** (solid)  $\nu_{\text{max}}$ : 3063, 1728 (C=O), 1605, 1551, 1481, 1404;  $^1\text{H NMR}$  (500 MHz, Chloroform- $d$ )  $\delta$  8.61 (dd,  $J = 4.8$ , 1.5 Hz, 1H, C5'-H), 8.30 (dd,  $J = 8.4$ , 1.8 Hz, 2H, 2  $\times$  C2''-H), 8.27 (dt,  $J = 7.9$ , 1.3 Hz, 1H, C4-H), 8.22 (t,  $J = 1.9$  Hz, 1H, C2-H), 7.88 (dd,  $J = 8.2$ , 1.5 Hz, 1H, C7'-H), 7.77 (dd,  $J = 8.4$ , 1.8 Hz, 2H, 2  $\times$  C3''-H), 7.68 (dt,  $J = 6.0$ , 1.4 Hz, 2H, 2  $\times$  C6''-H), 7.64 (t,  $J = 7.9$  Hz, 1H, C5-H), 7.54 – 7.47 (m, 3H, C6-H, 2  $\times$  C7''-H), 7.47 – 7.40 (m, 1H, C8''-H), 7.32 (dd,  $J = 8.2$ , 4.8 Hz, 1H, C6'-H);  $^{13}\text{C NMR}$  (126 MHz, Chloroform- $d$ )  $\delta$  164.9 (C), 164.8 (C), 156.3 (C4b), 151.5 (C1), 147.1 (C5'), 146.8 (C4''), 143.3 (C5b), 139.9 (C5''), 130.9 (2  $\times$  C2''), 130.4 (C5), 129.2 (2  $\times$  C7''), 128.5 (C8''), 128.1

(C3), 127.9 (C1''), 127.5 (2 × C6'', 2 × C3''), 126.1 (C6), 125.8 (C4), 121.6 (C2), 120.5 (C6'), 118.5 (C7'); *m/z* (ES<sup>+</sup>) 393.12 ([M+H]<sup>+</sup>, 100 %); HRMS (ES<sup>+</sup>) Calcd for C<sub>25</sub>H<sub>17</sub>O<sub>3</sub>N<sub>2</sub> [M+H]<sup>+</sup>: 393.1234, found 393.1233.

#### ***N*-(5-(benzo[d]oxazol-2-yl)-2-bromophenyl)-[1,1'-biphenyl]-4-carboxamide (14)**

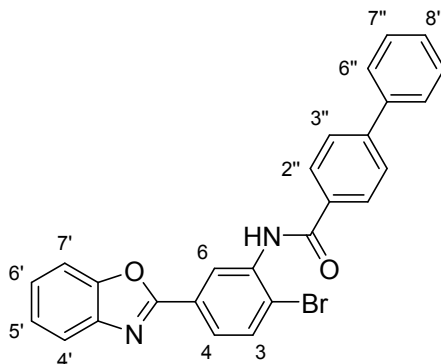

Prepared from **S49** (289 mg, 1.00 mmol) using general method B. **14** recovered after recrystallization (DCM) as a white solid (250 mg, 53%). mp 260-262 °C; IR (KBr)  $\nu_{\max}$ : 3269 (NH), 1653 (C=O), 1558, 1508, 1240; <sup>1</sup>H NMR (500 MHz, Chloroform-*d*)  $\delta$  9.48 (d, *J* = 2.1 Hz, 1H, C6-H), 8.61 (br s, 1H, NH), 8.10 – 8.03 (m, 2H, 2 × C2''-H), 7.96 (dd, *J* = 8.4, 2.1 Hz, 1H, C4-H), 7.82 – 7.73 (m, 4H, C3-H, C4'-H, 2 × C3''-H), 7.70 – 7.64 (m, 2H, 2 × C6''-H), 7.64 – 7.60 (m, 1H, C7'-H), 7.52 – 7.46 (m, 2H, 2 × C7''-H), 7.45 – 7.40 (m, 1H, C8''-H), 7.39 – 7.36 (m, 2H, C5'-H, C6'-H); <sup>13</sup>C NMR (126 MHz, Chloroform-*d*)  $\delta$  165.1 (CO), 162.1 (C2'), 151.0 (C5b), 145.5 (C4''), 142.2 (C4b), 139.9 (C5''), 136.6 (C1), 133.1 (C3), 132.9 (C1''), 129.2 (2 × C7''), 128.4 (C8''), 127.9 (2 × C2'', 2 × C3''), 127.4 (2 × C6''), 125.6 (ArCH), 124.9 (ArCH), 124.9 (C5), 124.3 (C4), 120.5 (C6), 120.3 (C4'), 117.0 (C2), 111.0 (C7'); *m/z* (ES<sup>+</sup>) 469.05 ([<sup>79</sup>BrM+H]<sup>+</sup>, 100 %), 471.05 ([<sup>81</sup>BrM+H]<sup>+</sup>, 100%); HRMS (ES<sup>+</sup>) Calcd for C<sub>26</sub>H<sub>18</sub>O<sub>2</sub>N<sub>2</sub>Br [M+H]<sup>+</sup>: 469.0546, found 469.0544.

#### ***N*-(2-chlorophenyl)-[1,1'-biphenyl]-4-carboxamide (15)**

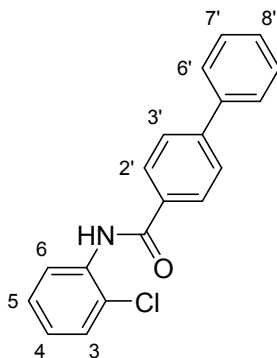

Prepared from 2-chloroaniline (128 mg, 1.00 mmol) using general method B. **15** recovered after recrystallization (DCM) as a white solid (250 mg, 81%). **mp** 144-146 °C; **IR** (solid)  $\nu_{\text{max}}$ : 3279 (NH), 1643 (C=O), 1520, 1435, 1312, 741; **<sup>1</sup>H NMR** (500 MHz, DMSO-*d*<sub>6</sub>)  $\delta$  10.13 (br s, 1H, NH), 8.10 (d, *J* = 8.4 Hz, 2H, 2 × C2'-H), 7.85 (d, *J* = 8.4 Hz, 2H, 2 × C3'-H), 7.80 – 7.73 (m, 2H, 2 × C6'-H), 7.62 (dd, *J* = 7.7, 1.6 Hz, 1H, C6-H), 7.57 (dd, *J* = 8.1, 1.6 Hz, 1H, C3-H), 7.55 – 7.49 (m, 2H, 2 × C7'-H), 7.47 – 7.40 (m, 1H, C8'-H), 7.40 (dd, *J* = 7.7, 1.6 Hz, 1H, C5-H), 7.31 (td, *J* = 7.7, 1.6 Hz, 1H, C4-H); **<sup>13</sup>C NMR** (126 MHz, DMSO-*d*<sub>6</sub>)  $\delta$  165.0 (CO), 143.4 (C4'), 139.1 (C5'), 135.1 (C1), 132.7 (C1'), 129.6 (C3), 129.1 (C2, 2 × C7'), 128.6 (C6), 128.4 (2 × C2'), 128.2 (C8'), 127.5 (C4, C5), 127.0 (2 × C6'), 126.7 (2 × C3'); ***m/z*** (ES<sup>+</sup>) 308.08 ([M+H]<sup>+</sup>, 100 %); **HRMS** (ES<sup>+</sup>) Calcd for C<sub>19</sub>H<sub>15</sub>ClNO [M+H]<sup>+</sup>: 308.0837, found 308.0839.

### ***N*-(2-bromo-5-(oxazolo[4,5-*b*]pyridin-2-yl)phenyl)benzamide (S31)**

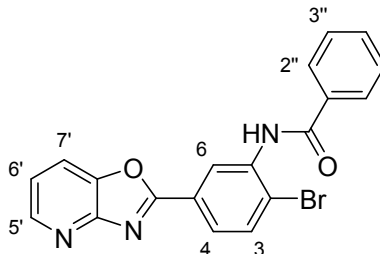

Prepared from **S45** (80 mg, 0.28 mmol) using general method B. **S31** recovered after recrystallization (DCM) as a white solid (74 mg, 67%). **mp** 249-251 °C; **IR** (solid)  $\nu_{\text{max}}$ : 3271 (NH), 3055, 1651(C=O), 1520, 1404, 1257, 779, 709, 640 (C-Br); **<sup>1</sup>H NMR** (400 MHz, DMSO-*d*<sub>6</sub>)  $\delta$  10.29 (br s, 1H, NH), 8.58 (dd, *J* = 4.9, 1.4 Hz, 1H, C5'-H), 8.47 (d, *J* = 2.0 Hz, 1H, C6-H), 8.28 (dd, *J* = 8.3, 1.4 Hz, 1H, C7'-H), 8.10 – 7.98 (m, 4H, C3-H, C4-H, 2 × C2''-H), 7.69 – 7.62 (m, 1H, C4''-H), 7.58 (dd, *J* = 8.3, 6.5 Hz, 2H, 2 × C3''-H), 7.50 (dd, *J* = 8.3, 4.9 Hz, 1H, C6'-H); **<sup>13</sup>C NMR** (101 MHz, DMSO-*d*<sub>6</sub>)  $\delta$  165.6 (CO), 163.7 (C2'), 155.3 (C4b), 146.8 (C5'), 142.9 (C5b), 137.6 (C1), 134.1 (C3), 133.8 (C1''), 132.1 (C4''), 128.6 (2 × C2''), 127.8 (2 × C3''), 126.8 (C6), 126.4 (C4), 125.8 (C5), 124.9 (C2), 121.1 (C6'), 119.3 (C7'); ***m/z*** (ES<sup>+</sup>) 394.02 ([<sup>79</sup>BrM+H]<sup>+</sup>, 100 %), 396.02 ([<sup>81</sup>BrM+H]<sup>+</sup>, 100%); **HRMS** (ES<sup>+</sup>) Calcd for C<sub>19</sub>H<sub>13</sub>O<sub>2</sub>N<sub>3</sub>Br [M+H]<sup>+</sup>: 394.0186, found 394.0188.

### ***N*-(2-bromo-5-(oxazolo[4,5-*b*]pyridin-2-yl)phenyl)-2-(3-methoxyphenyl)acetamide (S32)**

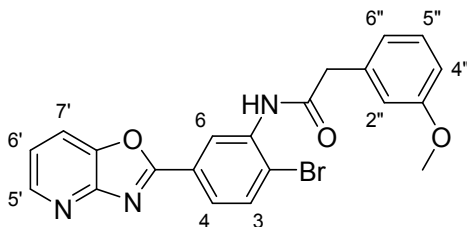



Prepared from **S45** (80 mg, 0.28 mmol) using general method B. **S32** recovered after recrystallization (DCM) as a white solid (92 mg, 75%). **mp** 211-213 °C; **IR** (solid)  $\nu_{\text{max}}$ : 3271 (NH), 1667 (C=O), 1551, 1404, 1265, 1157, 802; **<sup>1</sup>H NMR** (400 MHz, DMSO-*d*<sub>6</sub>)  $\delta$  9.87 (br s, 1H, NH), 8.56 (dd, *J* = 4.8, 1.4 Hz, 1H, C5'-H), 8.52 (s, 1H, C6-H), 8.27 (dd, *J* = 8.3, 1.4 Hz, 1H, C7'-H), 7.94 (s, 2H, C3-H, C4-H), 7.48 (dd, *J* = 8.3, 4.8 Hz, 1H, C6'-H), 7.27 (t, *J* = 7.8 Hz, 1H, C5''-H), 7.02 – 6.95 (m, 2H, C2''-H, C6''-H), 6.85 (dd, *J* = 7.8, 2.3 Hz, 1H, C4''-H), 3.78 (s, 2H, CH<sub>2</sub>), 3.76 (s, 3H, OCH<sub>3</sub>); **<sup>13</sup>C NMR** (101 MHz, DMSO-*d*<sub>6</sub>)  $\delta$  169.7 (CO), 163.8 (C2'), 159.3 (C3''), 155.3 (C4b), 146.8 (C5'), 142.9 (C5b), 137.2 (C), 137.0 (C), 134.1 (C3), 129.4 (C5''), 125.6 (C5), 125.4 (C4), 124.7 (C6), 121.6 (C2), 121.5 (C6''), 121.1 (C6'), 119.3 (C7'), 115.0 (C2''), 112.2 (C4''), 55.0 (OCH<sub>3</sub>), 42.6 (CH<sub>2</sub>); ***m/z*** (ES<sup>+</sup>) 438.04 ([<sup>79</sup>BrM+H]<sup>+</sup>, 100 %), 440.04 ([<sup>81</sup>BrM+H]<sup>+</sup>, 100%); **HRMS** (ES<sup>+</sup>) Calcd for C<sub>21</sub>H<sub>17</sub>O<sub>3</sub>N<sub>3</sub>Br [M+H]<sup>+</sup>: 438.0448, found 438.0449.

***N*-(2-methyl-5-(oxazolo[4,5-*b*]pyridin-2-yl)phenyl)-[1,1'-biphenyl]-4-carboxamide (S33)**

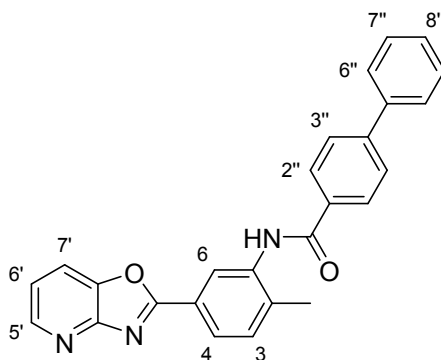

Prepared from **S47** (600 mg, 2.66 mmol) using general method B. **S33** recovered after recrystallization (DCM) as a white solid (360 mg, 33%). **mp** 275-277 °C; **IR** (solid)  $\nu_{\text{max}}$ : 3264 (NH), 1670 (C=O), 1520, 1404, 1258, 741; **<sup>1</sup>H NMR** (400 MHz, DMSO-*d*<sub>6</sub>)  $\delta$  10.17 (br s, 1H, NH), 8.55 (dd, *J* = 4.8, 1.4 Hz, 1H, C5'-H), 8.36 (d, *J* = 1.9 Hz, 1H, C6-H), 8.26 (dd, *J* = 8.2, 1.4 Hz, 1H, C7'-H), 8.14 (d, *J* = 8.3 Hz, 2H, 2 × C2''-H), 8.06 (dd, *J* = 8.0, 1.9 Hz, 1H, C4-H), 7.88 (d, *J* = 8.3 Hz, 2H, 2 × C3''-H), 7.81 – 7.73 (m, 2H, 2 × C6''-H), 7.58 (d, *J* = 8.0 Hz, 1H, C3-H), 7.53 (t, *J* = 7.5 Hz, 2H, 2 × C7''-H), 7.49 – 7.46 (m, 1H, C6'-H), 7.48 – 7.39 (m, 1H, C8''-H), 2.41 (s, 3H, CH<sub>3</sub>); **<sup>13</sup>C NMR** (101 MHz, DMSO-*d*<sub>6</sub>)  $\delta$  165.3 (CO), 164.7 (C2'), 155.6 (C4b), 146.6 (C5'), 143.3 (C4''), 142.8 (C5b), 139.1 (C5''), 138.8 (C2), 137.4 (C1), 133.0 (C1''), 131.6 (C3), 129.1

(2 × C7''), 128.5 (2 × C2''), 128.2 (C8''), 127.0 (2 × C6''), 126.7 (2 × C3''), 125.2 (C6), 124.9 (C4), 123.9 (C5), 120.8 (C6'), 119.0 (C7'), 18.3 (CH<sub>3</sub>); **m/z** (ES<sup>+</sup>) 406.15 ([M+H]<sup>+</sup>, 100 %); **HRMS** (ES<sup>+</sup>) Calcd for C<sub>26</sub>H<sub>20</sub>N<sub>3</sub>O<sub>2</sub> [M+H]<sup>+</sup>: 406.1550, found 406.1548.

***N*-(4-hydroxy-3-(oxazolo[4,5-*b*]pyridin-2-yl)phenyl)-[1,1'-biphenyl]-4-carboxamide (S34)**

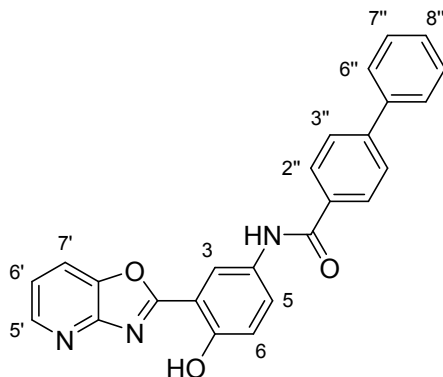

Prepared from **S48** (300 mg, 1.32 mmol) the general method B. **S34** recovered after recrystallization (DCM) as an off-white solid (346 mg, 64%). **mp** 330-332 °C; **IR** (KBr)  $\nu_{\text{max}}$ : 3425 (NH), 3257, 3094, 3044, 1636 (C=O), 1534; **<sup>1</sup>H NMR** (500 MHz, DMSO-*d*<sub>6</sub>)  $\delta$  10.85 (br s, 1H, OH), 10.44 (br s, 1H, NH), 8.72 (d, *J* = 2.7 Hz, 1H, C3-H), 8.59 (dd, *J* = 4.7, 1.4 Hz, 1H, C5'-H), 8.35 (dd, *J* = 7.9, 1.4 Hz, 1H, C7'-H), 8.11 (d, *J* = 7.9 Hz, 2H, 2 × C2''-H), 7.92 (dd, *J* = 8.9, 2.7 Hz, 1H, C5-H), 7.86 (d, *J* = 8.2 Hz, 2H, 2 × C3''-H), 7.77 (d, *J* = 7.3 Hz, 2H, 2 × C6''-H), 7.58 – 7.48 (m, 3H, C6'-H, 2 × C7''-H), 7.43 (t, *J* = 7.3 Hz, 1H, C8''-H), 7.18 (d, *J* = 8.9 Hz, 1H, C6-H); **<sup>13</sup>C NMR** (126 MHz, DMSO-*d*<sub>6</sub>)  $\delta$  165.0 (CO), 164.6 (C2'), 154.4 (C1), 153.9 (C4b), 146.8 (C5'), 143.2 (C4''), 141.7 (C5b), 139.1 (C5''), 133.4 (C1''), 131.8 (C4), 129.1 (2 × C7''), 128.3 (2 × C2''), 128.2 (C8''), 127.5 (C5), 127.0 (2 × C6''), 126.7 (2 × C3''), 121.1 (C6'), 119.3 (C7'), 119.1 (C3), 117.6 (C6), 109.8 (C2); **m/z** (ES<sup>-</sup>) 405.88 ([M-H]<sup>-</sup>, 100 %); **HRMS** (ES<sup>-</sup>) Calcd for C<sub>25</sub>H<sub>16</sub>N<sub>3</sub>O<sub>3</sub> [M-H]<sup>-</sup>: 406.1185, found 406.1192.

***N*-(2-bromo-5-(oxazolo[4,5-*b*]pyridin-2-yl)phenyl)-[1,1'-biphenyl]-4-sulfonamide (S35)**

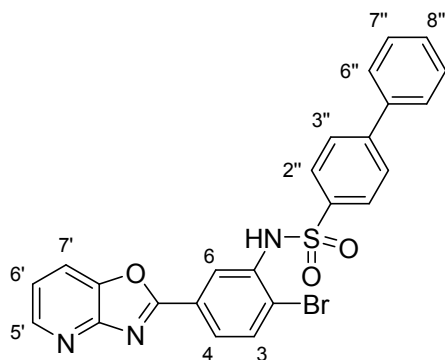

Prepared from **S45** (80 mg, 0.28 mmol) using the general method B. **S35** recovered after recrystallization (DCM) as a white solid (75 mg, 53%). **mp** 240-242 °C; **IR** (solid)  $\nu_{\text{max}}$ : 3233 (NH), 1605, 1543, 1474, 1396 (S=O), 1342, 1258, 1157 (S=O); **<sup>1</sup>H NMR** (500 MHz, Chloroform-*d*)  $\delta$  8.66 – 8.60 (m, 2H, C5'-H, C6-H), 7.98 (dd,  $J$  = 8.4, 2.0 Hz, 1H, C4-H), 7.96 – 7.88 (m, 3H, C7'-H, 2  $\times$  C2''-H), 7.66 (d,  $J$  = 8.4 Hz, 2H, 2  $\times$  C3''-H), 7.63 (d,  $J$  = 8.4 Hz, 1H, C3-H), 7.60 – 7.54 (m, 2H, 2  $\times$  C6''-H), 7.44 (t,  $J$  = 7.6 Hz, 2H, 2  $\times$  C7''-H), 7.40 (d,  $J$  = 6.8 Hz, 1H, C8''-H), 7.36 (dd,  $J$  = 8.1, 4.9 Hz, 1H, C6'-H), 7.17 (br s, 1H, NH); **<sup>13</sup>C NMR** (126 MHz, Chloroform-*d*)  $\delta$  164.1 (C2'), 156.2 (C4b), 147.3 (C5'), 146.6 (C4''), 143.4 (C5b), 139.0 (C5''), 137.1 (C1''), 135.7 (C1), 133.7 (C3), 129.2 (2  $\times$  C7''), 128.8 (C8''), 128.1 (2  $\times$  C2''), 127.9 (2  $\times$  C3''), 127.4 (2  $\times$  C6''), 127.3 (C5), 125.8 (C4), 121.0 (C6), 120.8 (C6'), 120.0 (C2), 118.7 (C7'); ***m/z*** (ES<sup>+</sup>) 506.02 ([<sup>79</sup>BrM+H]<sup>+</sup>, 100%), 508.02 ([<sup>81</sup>BrM+H]<sup>+</sup>, 100%); **HRMS** (ES<sup>+</sup>) Calcd for C<sub>24</sub>H<sub>17</sub>O<sub>3</sub>N<sub>3</sub>BrS [M+H]<sup>+</sup>: 506.0169, found 506.0160.

#### ***N*-(2-bromo-5-nitrophenyl)-[1,1'-biphenyl]-4-carboxamide (S38)**

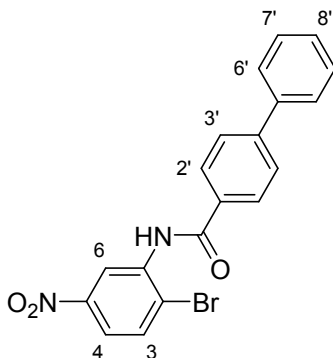

Biphenyl-4-carbonyl chloride (461 mg, 2.13 mmol, 1.0 eq.) was added to 2-bromo-5-nitroaniline (308 mg, 1.42 mmol, 1.5 eq.) in DCM (15 mL), followed by pyridine (0.17 mL, 2.13 mmol, 1.5 eq.). The

reaction was stirred at room temperature for 18 h. **S38** was recovered after recrystallization (DCM) as a white solid (300 mg, 53%). mp 203-205 °C; IR (solid)  $\nu_{\text{max}}$ : 3379 (NH), 1690 (C=O), 1528 (N-O), 1412, 1312, 741, 602 (C-Br);  $^1\text{H NMR}$  (500 MHz, DMSO- $d_6$ )  $\delta$  10.38 (s, 1H, NH), 8.51 (d,  $J = 1.8$  Hz, 1H, C6-H), 8.12 (d,  $J = 8.1$  Hz, 2H, 2  $\times$  C2'-H), 8.06 (s, 2H, C3-H, C4-H), 7.89 (d,  $J = 8.1$  Hz, 2H, 2  $\times$  C3'-H), 7.81 – 7.75 (m, 2H, 2  $\times$  C6'-H), 7.52 (t,  $J = 7.5$  Hz, 2H, 2  $\times$  C7'-H), 7.44 (t,  $J = 7.5$  Hz, 1H, C8'-H);  $^{13}\text{C NMR}$  (126 MHz, DMSO- $d_6$ )  $\delta$  165.2 (CO), 146.9 (C5), 143.8 (C4'), 139.0 (C5'), 137.8 (C1), 134.0 (C3), 132.2 (C1'), 129.1 (2  $\times$  C7'), 128.6 (2  $\times$  C2'), 128.3 (C8'), 127.5 (C2), 127.0 (2  $\times$  C6'), 126.8 (2  $\times$  C3'), 122.3 (C6), 121.9 (C4);  $m/z$  (ES $^+$ ) 497.02 ([ $^{79}\text{BrM}+\text{Na}$ ] $^+$ , 100 %), 399.02 ([ $^{81}\text{BrM}+\text{H}$ ] $^+$ , 100%); HRMS (ES $^+$ ) Calcd for C<sub>19</sub>H<sub>14</sub>BrN<sub>2</sub>O<sub>3</sub> [M+H] $^+$ : 397.0182, found 397.0184.

### ***N*-(5-amino-2-bromophenyl)-[1,1'-biphenyl]-4-carboxamide (S39)**

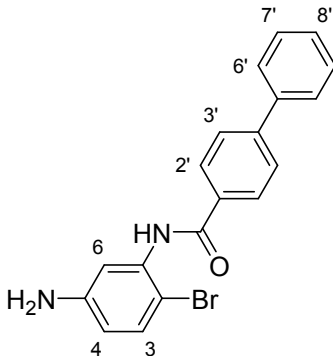

To **S38** (100 mg, 0.25 mmol, 1.0 eq.) and NH<sub>4</sub>Cl (67 mg, 1.25 mmol, 5.0 eq.) in MeOH (2 mL) and H<sub>2</sub>O (1 mL) at 100 °C was added iron powder (70 mg, 1.25 mmol, 5.0 eq.) portionwise. After 3 h the reaction was cooled to room temperature, filtered through Celite and concentrated *in vacuo*. The residue was dissolved in EtOAc (10 mL) and washed with H<sub>2</sub>O (2  $\times$  5 mL), brine (5 mL), dried over MgSO<sub>4</sub>, filtered and concentrated to yield the desired product **S39** as a white solid (83 mg, 90%). **S39** was used in the next step without further purification.  $^1\text{H NMR}$  (500 MHz, DMSO- $d_6$ )  $\delta$  9.77 (br s, 1H, NH), 8.11 – 7.99 (m, 2H, 2  $\times$  C2'-H), 7.89 – 7.79 (m, 2H, 2  $\times$  C3'-H), 7.79 – 7.73 (m, 2H, 2  $\times$  C6'-H), 7.55 – 7.46 (m, 2H, 2  $\times$  C7'-H), 7.46 – 7.39 (m, 1H, C8'-H), 7.27 (d,  $J = 8.6$  Hz, 1H, C3-H), 6.85 (d,  $J = 2.7$  Hz, 1H, C6-H), 6.44 (dd,  $J = 8.6, 2.7$  Hz, 1H, C4-H), 5.39 (br s, 2H, NH<sub>2</sub>);  $^{13}\text{C NMR}$  (126 MHz, DMSO- $d_6$ )  $\delta$  164.7 (CO), 148.8 (C5), 143.2 (C4'), 139.1 (C5'), 136.4 (C1), 133.1 (C1'), 132.3 (C3), 129.1 (2  $\times$  C7'), 128.3 (2  $\times$  C2'), 128.2 (C8'), 127.0 (2  $\times$  C6'), 126.7 (2  $\times$  C3'), 113.6 (C4, C6), 104.5 (C2);

### ***N*-(3-([1,1'-biphenyl]-4-carboxamido)-4-bromophenyl)furan-2-carboxamide (S36)**

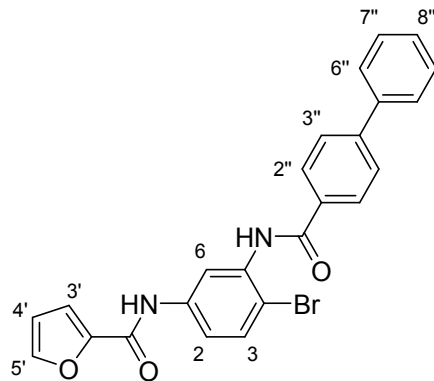

2-Furoyl chloride (47 mg, 0.36 mmol, 3.0 eq.) was added to **S39** (44 mg, 0.12 mmol, 1.0 eq.) in DCM (1.2 mL), followed by pyridine (29  $\mu$ L, 0.36 mmol, 3.0 eq.). The reaction was stirred at room temperature for 18 h. The reaction was concentrated *in vacuo* and purified *via* the Biotage SP4 (silica-packed SNAP column 4 g; 0-4% MeOH/DCM) to give the title product **S36** as a white solid (40 mg, 72%). mp 210-212 °C; IR (solid)  $\nu_{\text{max}}$ : 3410 (NH), 3317 (NH), 1674 (C=O), 1647 (C=O), 1508, 1260, 750;  $^1\text{H NMR}$  (500 MHz, Chloroform-*d*)  $\delta$  8.58 (d,  $J$  = 2.6 Hz, 1H, C6-H), 8.57 (br s, 1H, NH), 8.24 (br s, 1H, NH), 8.04 – 8.00 (m, 2H, 2  $\times$  C2''-H), 7.94 (dd,  $J$  = 8.8, 2.6 Hz, 1H, C2-H), 7.79 – 7.74 (m, 2H, 2  $\times$  C3''-H), 7.69 – 7.63 (m, 2H, 2  $\times$  C6''-H), 7.58 (d,  $J$  = 8.8 Hz, 1H, C3-H), 7.54 (dd,  $J$  = 1.7, 0.9 Hz, 1H, C5'-H), 7.53 – 7.46 (m, 2H, 2  $\times$  C7''-H), 7.45 – 7.38 (m, 1H, C8''-H), 7.27 (d,  $J$  = 0.9 Hz, 1H, C3'-H), 6.58 (dd,  $J$  = 3.5, 1.7 Hz, 1H, C4'-H);  $^{13}\text{C NMR}$  (126 MHz, Chloroform-*d*)  $\delta$  165.2 (CO), 156.2 (CO), 147.6 (C2'), 145.4 (C4''), 144.6 (C5'), 139.9 (C5''), 137.9 (C5), 136.2 (C1), 133.1 (C1''), 132.9 (C3), 129.2 (2  $\times$  C7''), 128.4 (C8''), 127.8 (2  $\times$  C2'', 2  $\times$  C3''), 127.4 (2  $\times$  C6'), 117.0 (C2), 115.8 (C3'), 112.9 (C4'), 112.3 (C6), 108.0 (C4);  $m/z$  (ES<sup>+</sup>) 461.05 ([ $^{79}\text{BrM}+\text{Na}$ ]<sup>+</sup>, 100 %), 463.05 ([ $^{81}\text{BrM}+\text{H}$ ]<sup>+</sup>, 100%); HRMS (ES<sup>+</sup>) Calcd for C<sub>24</sub>H<sub>18</sub>BrN<sub>2</sub>O<sub>3</sub> [M+H]<sup>+</sup>: 461.0495, found 461.0493.

### **N-(3-((1,1'-biphenyl)-4-carboxamido)-4-bromophenyl)thiophene-2-carboxamide (S37)**

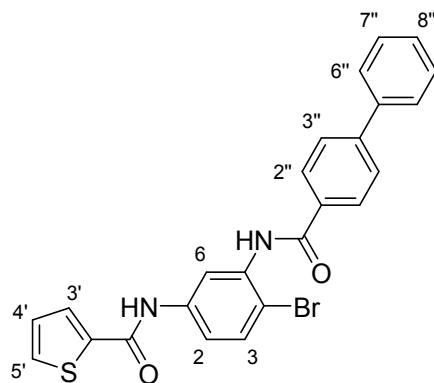

2-Thiophene carbonyl chloride (36 mg, 0.25 mmol, 3.0 eq.) was added to **S39** (30 mg, 0.08 mmol, 1.0 eq.) in DCM (1.0 mL), followed by pyridine (20  $\mu$ L, 0.25 mmol, 3.0 eq.). The reaction was stirred at room temperature for 18 h. The reaction was concentrated *in vacuo* and purified *via* the Biotage SP4 (silica-packed SNAP column 4 g; 0-40% EtOAc/hexanes) to give the title product **S37** as a white solid (30 mg, 85%). **mp** 189-191  $^{\circ}$ C; **IR** (solid)  $\nu_{\text{max}}$ : 3410 (NH), 3279 (NH), 1643 (C=O), 1589, 1515, 1420, 1258, 1018, 802, 741, 694;  **$^1\text{H NMR}$**  (500 MHz, Chloroform-*d*)  $\delta$  8.58 – 8.47 (m, 2H, C6-H, NH), 8.11 (br s, 1H, NH), 8.02 – 7.95 (m, 2H, 2  $\times$  C2''-H), 7.91 (dd,  $J$  = 8.8, 2.6 Hz, 1H, C2-H), 7.77 – 7.69 (m, 2H, 2  $\times$  C3''-H), 7.68 – 7.60 (m, 3H, C3'-H, 2  $\times$  C6''-H), 7.56 (d,  $J$  = 8.8 Hz, 1H, C3-H), 7.54 (dd,  $J$  = 5.0, 1.2 Hz, 1H, C5'-H), 7.52 – 7.46 (m, 2H, 2  $\times$  C7''-H), 7.45 – 7.39 (m, 1H, C8''-H), 7.11 (dd,  $J$  = 5.0, 3.7 Hz, 1H, C4'-H);  **$^{13}\text{C NMR}$**  (126 MHz, Chloroform-*d*)  $\delta$  165.4 (CO), 160.2 (CO), 145.4 (C4''), 139.8 (C5''), 139.1 (C2'), 138.3 (C5), 136.0 (C1), 133.0 (C1''), 132.8 (C3), 131.3 (C5'), 129.2 (2  $\times$  C7''), 128.8 (C3'), 128.4 (C8''), 128.1 (C4'), 127.8 (2  $\times$  C2'', 2  $\times$  C3''), 127.4 (2  $\times$  C6'), 117.5 (C2), 112.7 (C6), 108.2 (C4);  **$m/z$**  (ES<sup>+</sup>) 499.01 ([<sup>79</sup>BrM+Na]<sup>+</sup>, 100 %), 501.01 ([<sup>81</sup>BrM+H]<sup>+</sup>, 100%); **HRMS** (ES<sup>+</sup>) Calcd for C<sub>24</sub>H<sub>17</sub>BrN<sub>2</sub>O<sub>2</sub>SNa [M+Na]<sup>+</sup>: 499.0086, found 499.0080

## 5 $^1\text{H NMR}$ Spectra of Purchased Compounds (Chembridge)

### 2-(1-Adamantyl)-*N*-(2-chloro-5-[1,3]oxazolo[4,5-*b*]pyridin-2-ylphenyl)acetamide (3)

B0443935 DMSO-D6/CCL4=2:1 Dsh

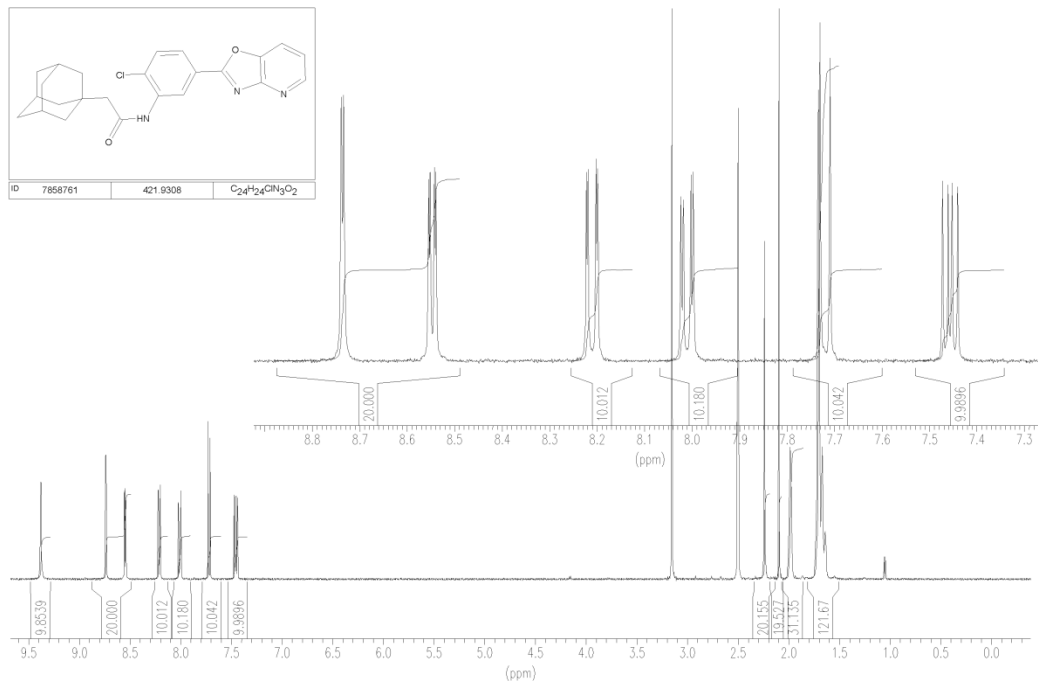

### ***N*-(2-chloro-5-[(1,3]oxazolo[4,5-b]pyridin-2-yl)phenyl)-1-naphthamide (4)**

h0153613

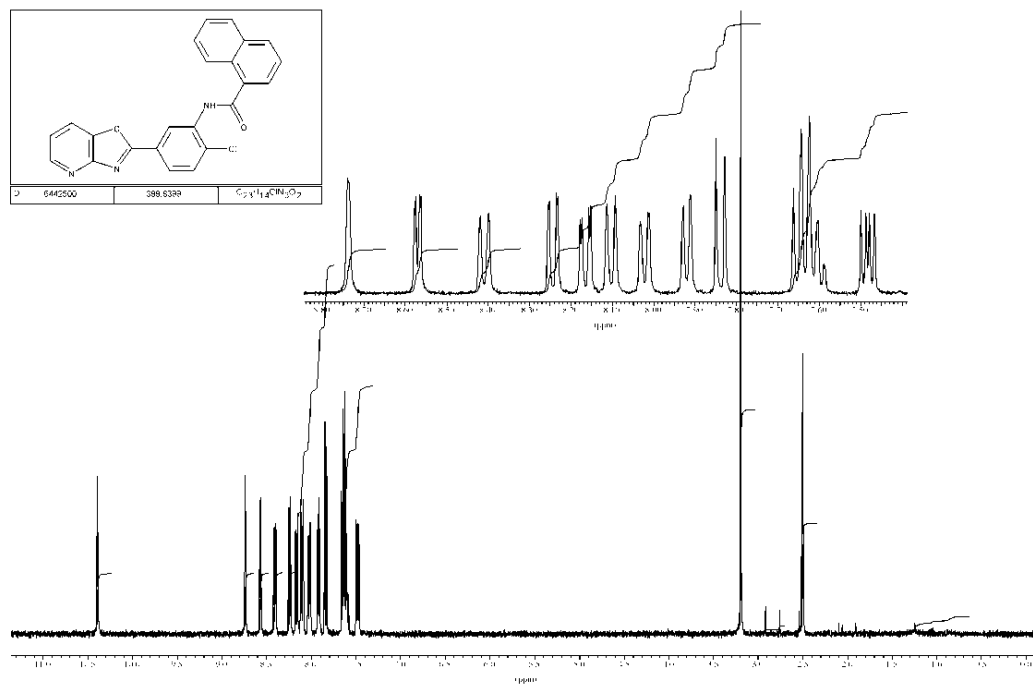

### **3-(Benzyloxy)-*N*-(2-chloro-5-[(1,3]oxazolo[4,5-b]pyridin-2-yl)phenyl)benzamide (5)**

16153647

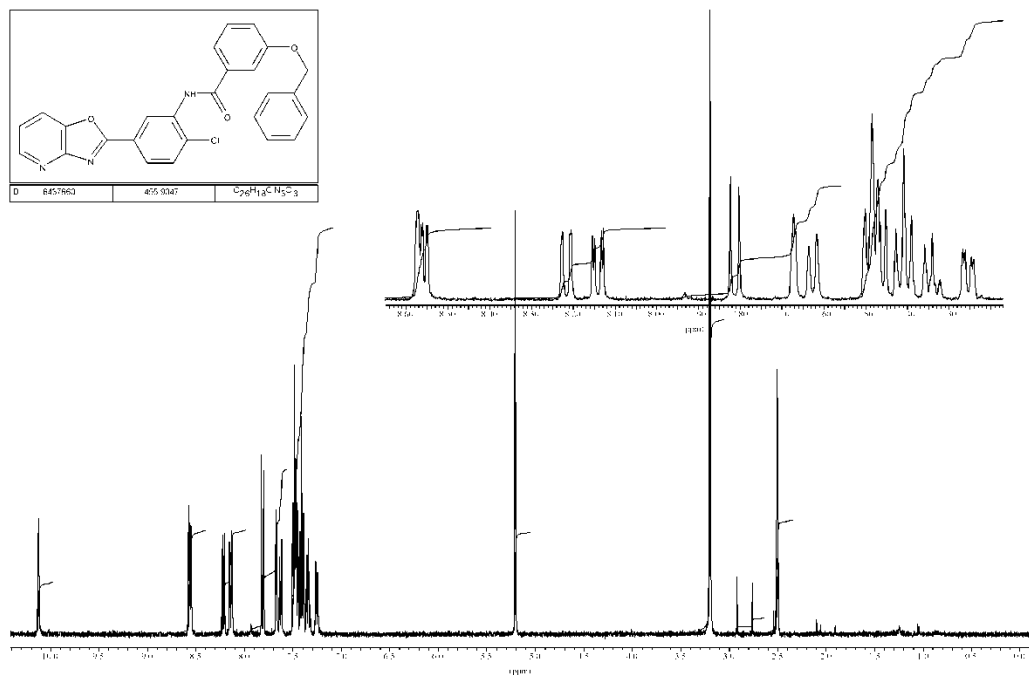

**N-(2-chloro-5-[1,3]oxazolo[4,5-b]pyridin-2-ylphenyl)acetamide (6)**

B1537-21

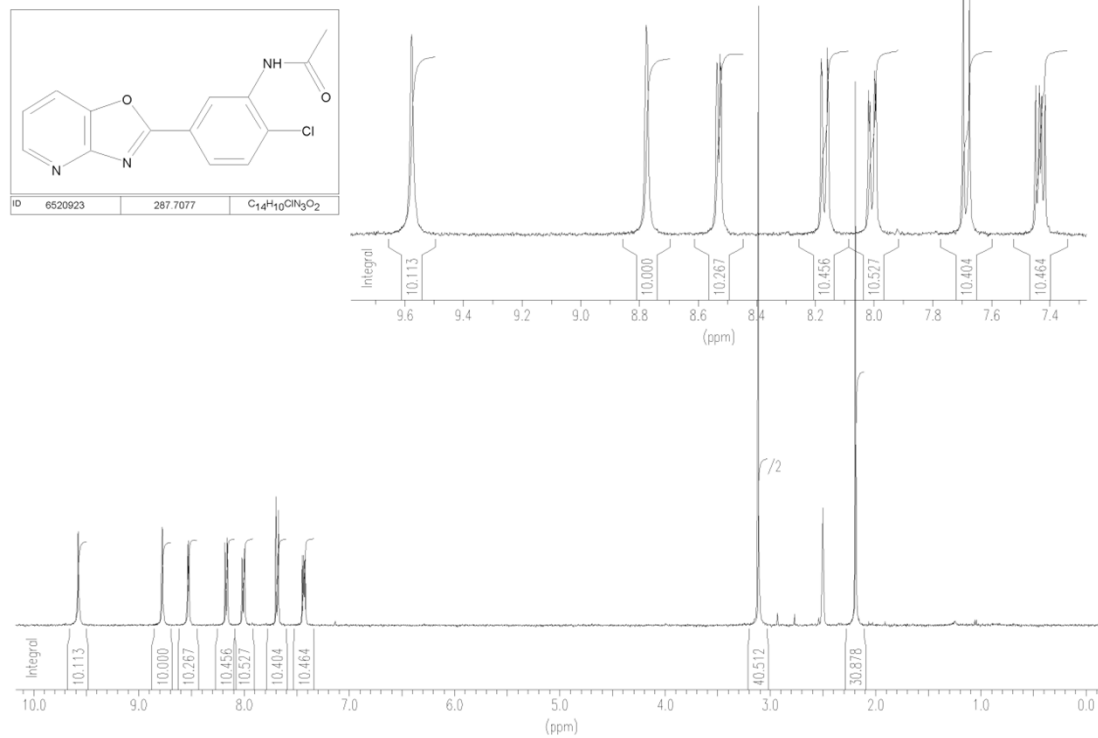

**N-(2-chloro-5-[1,3]oxazolo[4,5-b]pyridin-2-ylphenyl)-2-(4-cyclohexylphenoxy)acetamide (S29)**



b0190505

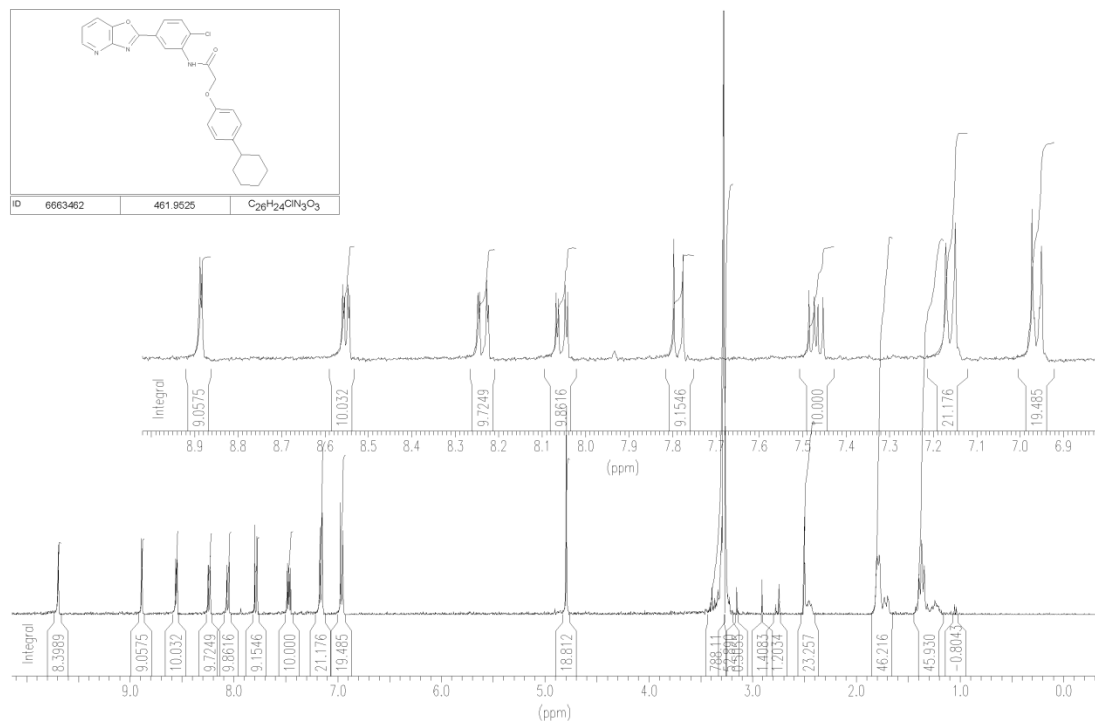

### 5-Bromo-N-(2-chloro-5-[1,3]oxazolo[4,5-b]pyridin-2-ylphenyl)-2-furamide (S30)

B0443991 DMSO-D6/CCL4=2:1 Dsh

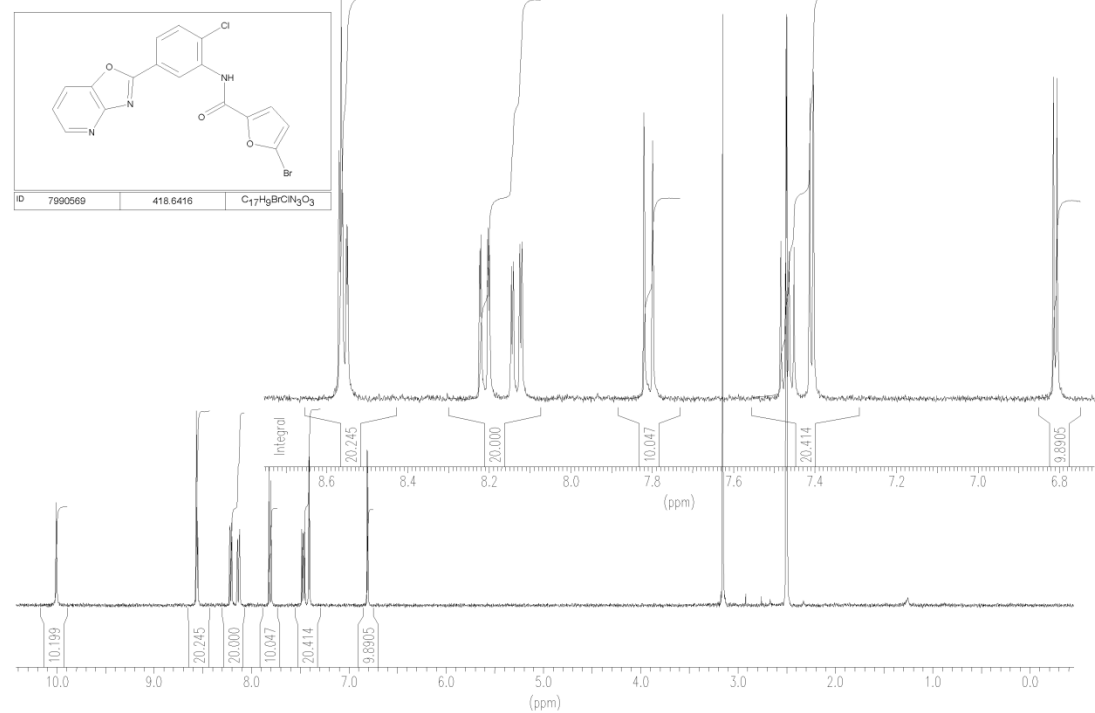

## 6 References

1. Taylor, P. *et al.* Ligand discovery and virtual screening using the program LIDAEUS. *Br. J. Pharmacol.* **153**, S55–67 (2008).
2. Petukhov, M. *et al.* Large-scale conformational flexibility determines the properties of AAA+ TIP49 ATPases. *Structure* **20**, 1321–31 (2012).
3. Sanders, M. P. a *et al.* Comparative analysis of pharmacophore screening tools. *J. Chem. Inf. Model.* **52**, 1607–20 (2012).
4. Pearlman, R. Concord. Tripos International; *St. Louis, Missouri, 63144, USA; Distrib. by.*
5. Hann, M. M. & Oprea, T. I. Pursuing the leadlikeness concept in pharmaceutical research. *Curr. Opin. Chem. Biol.* **8**, 255–63 (2004).
6. Sauton, N., Lagorce, D., Villoutreix, B. O. & Miteva, M. MS-DOCK: accurate multiple conformation generator and rigid docking protocol for multi-step virtual ligand screening. *BMC Bioinformatics* **9**, 184 (2008).
7. Wang, R., Lu, Y. & Wang, S. Comparative evaluation of 11 scoring functions for molecular docking. *J. Med. Chem.* **46**, 2287–303 (2003).
8. Wang, R. & Wang, S. How does consensus scoring work for virtual library screening? An idealized computer experiment. *J. Chem. Inf. Comput. Sci.* **41**, 1422–6 (2001).
9. Houston, D. R. & Walkinshaw, M. D. Consensus docking: improving the reliability of docking in a virtual screening context. *J. Chem. Inf. Model.* **53**, 384–90 (2013).
10. Neudert, G. & Klebe, G. DSX: a knowledge-based scoring function for the assessment of protein-ligand complexes. *J. Chem. Inf. Model.* **51**, 2731–45 (2011).
11. Dolinsky, T. J. *et al.* PDB2PQR: expanding and upgrading automated preparation of biomolecular structures for molecular simulations. *Nucleic Acids Res.* **35**, W522–5 (2007).
12. Li, H., Robertson, A. D. & Jensen, J. H. Very fast empirical prediction and rationalization of protein pKa values. *Proteins* **61**, 704–21 (2005).
13. O'Boyle, N. M. *et al.* Open Babel: An open chemical toolbox. *J. Cheminform.* **3**, 33 (2011).
14. Trott, O. & Olson, A. J. AutoDock Vina: improving the speed and accuracy of docking with a new scoring function, efficient optimization, and multithreading. *J. Comput. Chem.* **31**, 455–61 (2010).
15. Huey, R., Morris, G. M., Olson, A. J. & Goodsell, D. S. Software News and Update A Semiempirical Free Energy Force Field with Charge-Based Desolvation. (2007). doi:10.1002/jcc
16. Ferrins, L. *et al.* 3-(Oxazolo[4,5-b]pyridin-2-yl)anilides as a novel class of potent inhibitors for the kinetoplastid *Trypanosoma brucei*, the causative agent for human African trypanosomiasis. *Eur. J. Med. Chem.* **66**, 450–65 (2013).
17. Zhuravlev, F. A. Unprecedentedly mild direct Pd-catalyzed arylation of oxazolo[4,5-b]pyridine. *Tetrahedron Lett.* **47**, 2929–2932 (2006).
18. Myllymäki, M. J. & Koskinen, A. M. P. A rapid method for the preparation of 2-substituted oxazolo[4,5-b]pyridines using microwave-assisted direct condensation reactions. *Tetrahedron Lett.* **48**, 2295–2298 (2007).
19. Holler, M. G., Campo, L. F., Brandelli, A. & Stefani, V. Synthesis and spectroscopic characterisation of 2-(2'-hydroxyphenyl)benzazole isothiocyanates as new fluorescent probes for proteins. *J. Photochem. Photobiol. A Chem.* **149**, 217–225 (2002).
